# Supplementary material for: The prognostic significance of histologic variant on survival outcomes in patients with metastatic urothelial carcinoma receiving immune checkpoint inhibitor therapy
Source: BMC Cancer. 2023 Sep 15;23:871. doi: 10.1186/s12885-023-11398-w (PMC10504763; doi:10.1186/s12885-023-11398-w)
Supplement: Supplementary file 1 — Supplementary Material 1 [file 12885_2023_11398_MOESM1_ESM.xlsx]

## Sheet: patient data
Chart No	Birthday	Sex	Age	diagnose date	pathology	primary site	Origin	Variant	lung meta	liver meta	LN meta	bone meta	No of visceral mets	ECOG	eGFR	WBC	Hb	Platelet	Segment	Lymphocyte	Cr	AST	ALT	Ca	LDH	Patho No.	IO which line	IO drug	IO combine drug	IO start date	IO best response	IO end date	PD date	PD or not	PFS event	AE	sequent Tx	Last follow date	expire	PDL1
patient 1	1935-01-01	0	85	2018-09-03	infiltrating papillary urothelial carcinoma	bladder	0	0	0	0	1	0	0	.	54.6	6.3	14.2	147	66.4	23.9	0.97	26	18	.	.		1	Pembrolizumab	NA	2019-07-24	PD	2019-09-04	2020-07-06	1	1	.	gemcitabine	2021-10-20	0	0
patient 2	1966-05-09	1	53	2019-02-27	infiltrating papillary urothelial carcinoma	bladder	0	0	0	0	0	0	0	0	59.3	7.1	8.5	422	60.2	21.4	1.27	NA	19	NA	NA	S2019=08202	1	Pembrolizumab	NA	2019-03-11	PD	2019-06-04	2019-05-08	1	1	NA	.	2022-07-22	0	0
298694	1954-12-27	1	66	2019-06-03	UC	renal pelvis	1	0						0	76.76	12.9	14.6	209	79.5	14	0.98	20	16	9.5	194		1	Atezolizumab	GC + RT	2019-08-08	PR	2019-08-29	2019-12-17	1	1	Hiccup skin itching Constipation	NA	2020-01-30	1	75
869403	1943-07-01	0	69	2017/10/02(CT)	UC (2017/10/03)	bladder	0	0	0	0	0	0	0	0	51.66	5.7	11.5	176	69.9	23.3	1.04	29	12	9.3	240		1	Avelumab	G+C	2018-04-20	SD	NA	.	0	0	Hypothroidism	NA	2020-11-09	1	NA
patient 3	1952-10-15	0	66	2018-07-20	urothelial carcinoma	right renal pelvis	1	0	0	0	1	0	0	2	4.4	6.8	7.6	136	82	12	9.35	51	47	8.7	527	S2018=29255	1	Atezolizumab	NA	2018-08-06	CR	2019-02-15	2022-09-28	0	0	Steven Johnson syndrome, TB	.	2022-09-28	0	2
1503453	1951-09-07	0	86	2018-12-01	UC	Renal pelvis	1	0	0	0	1	0	0	0	57.11	9.7	8.3	395	96.1	2.9	0.97	35	126	NA	NA		1	Atezolizumab	GC	2019-09-27	PR	2019-11-06	.	0	0	URI, skin rash	NA	2022-07-07	0	NA
patient 4	1949-11-01	0	69	2019-02-26	infiltrating urothelial carcinoma, micropapillary variant, high grade	bladder	0	1	0	0	0	0	0	0	.	.	.	.	.	.	.	.	.	.	.	S2019=44426	1	Pembrolizumab	NA	2019-03-11	PR	2019-08-28	2019-08-28	1	1	NA	gem/cisplatin	2020-02-09	1	10
1593300	1965-08-23	1	86	2017/12/03(CT)	UC (2016/12/08)	bladder	0	0	1	0	1	1	2	3	51.11	16.8	8.8	114	87	1	1.45	67	29	10.4	NA		1	Pembrolizumab	Paclitaxel	2017-02-02	PD	2017-02-02	2017-02-08	1	1	NA	NA	2017-02-08	1	0
patient 5	1945-10-13	0	71	2015/12/9 (CT)	UC (2015/11/23)	kidney	1	0	1	1	1	0	2	2	51.66	8.9	10.5	156	67.6	18.4	1.05	25	20	8.9	NA		1	Pembrolizumab	NA	2016-04-20	PD	2016-06-08	2016-07-06	1	1	Fatigue constipation	NA	2016-08-28	1	NA
2106119	1957-07-11	1	79	2016-12-16	UC (2016/12/16)	kidney	1	0	1	0	0	0	1	0	42.18	9.3	14.1	179	74.9	20.1	1.67	30	36	9.3	185		1	Durvalumab	Tremelimumab	2017-01-19	PD	2017-04-11	2017-03-10	1	1	Dermatitis Fever Fatigue Abnormal renal function	G+C	2019-02-01	1	NA
patient 6	1934-06-18	0	86	2020-05-29	UC with squamous differentiation	renal pelvis	1	1	1	1	1	0	2	1	< 60	10.2	12.7	263	69.6	23.3	1.38	.	9	.	.		1	Durvalumab	NA	2020-07-31	PD	NA	2020-09-07	1	1	NA	NA	2020-09-21	0	NA
patient 7	1947-04-08	0	74	2017-06-14	UC	bladder	0	0	0	0	1	1	0	1	67.2	10.4	13	363	79.8	10.4	0.83	15	12	9.5	152		1	Nivolumab	NA	2021-06-01	PD	2021-06-29	2021-07-16	1	1	fatigue,poor intake	NA	2021-07-24	1	30
patient 8	1933-11-04	1	86	2019-09-02	UC	renal pelvis	1	0	0	0	1	0	0	1	39.48	7.7	12.3	221	65	22.4	1.66	25	13	9	158		1	Pembrolizumab	NA	2019-06-26	CR	2020-02-27	2022-09-08	0	0	Fatigue Constipation Poor appetite Skin itch Skin rash	NA	2022-09-08	0	NA
patient 9	1955-11-10	1	63	2018-08-03	UC	KIdney	1	0	0	0	1	0	0	0	47.267	10.8	10.8	338	77.6	15.1	1.5	26	55	11.7	126		1	Nivolumab + Ipilimumab	NA	2018-08-30	SD	2020-01-02	2020-01-16	1	1	fatigue	NA	2021-01-30	1	NA
2398812	1961-06-15	1	67	2020-06-01	UC	kidney	1	0	1	1	1	1	3	0	57.847	8.7	11.6	462	73.1	16	1,27	18	19	9.2	204		1	Atezolizumab	G+CDDP	2020-09-29	PD	2021-05-05	2021-05-06	1		vomiting	NA	2021-06-16	0	5
patient 10	1942-01-16	0	79	2020-11-16	UC	bladder	0	0	0	0	1	0	0	0	70.204	7.9	11	461	76.1	11.8	0.79	39	19	NA	188		1	Atezolizumab	NA	2020-12-07	PD	2021-10-22	2021-11-02	1	1	NA	.	2021-11-25	0	>5%
2429615	1959-06-15	1	63	2017-10-27	UC(2017/11/6)	kidney	1	0	0	0	1	0	0	1	5	2.8	8.7	121	63.4	23.7	10.43	36	30	8.8	279		3	Atezolizumab	taxol	2018-09-25	PD	2018-12-04	2018-12-18	1	1		atezo+adriamycin	2022-04-17	1	NA
patient 11	1942-11-24	1	76	2018/6/20(CT)	UC (2018/07/06)	ureter	1	0	0	1	1	0	1	1	53.67	6.6	11.7	184	67.9	23.9	1.3	21	18	9.1	226		1	Atezolizumab	NA	2018-07-23	PD	2018-09-25	2018-10-01	1	1	Sore waist	NA	2019-01-07	0	NA
patient 12	1940/6/12	1	79	2019-06-06	left retroperitoneal carcinoma(urothelial origin, GATA-3+)	ureter	1	0	0	0	1	0	0	2	< 5	.	.	.	.	.	.	.	.	.	.		1	Pembrolizumab	NA	2019-06-12	PR	2019/7/24	2020-11-14	1	1	serositis	.	2021-12-31	0	0
patient13	1944-01-21	1	73	2011-02-11	infiltrative urothelial carcinoma, high grade	urinary bladder	0	0	1	0	1	1	2	2	60.5	10.8	8.1	335	88.2	7.2	1.18	17	18	NA	171	S2016=11652	1	Nivolumab	NA	2016-08-22	PD	2016-09-23	2016-10-16	1	1	leukocytosis	NA	2016-10-29	1	NA
patient 14	1944-08-31	0	73	2017-11-07	small cell neuroendocrine carcinoma	left ureter	1	1	0	0	1	0	0	1	62.12	16.4	13.4	201	90.5	4.1	0.89	16	9	NA	NA	F2017=00143	1	Pembrolizumab	NA	2017-11-10	PD	2017-12-22	2018-01-08	1	1	poor appetite, constipation	GC	2018-05-27	1	0
2676721	1958-07-20	1	69	2017/5/31(CT)	UC (2017/08/06)	bladder	0	0	0	1	0	0	1	0	84.21	4.8	12.2	189	62.8	23.1	0.92	30	16	9.7	213		1	Avelumab	G+C	2018-01-19	SD	NA	2018-07-03	1	1	Dermatitis hyponatremia	NA	2022-09-22	0	NA
2777890	1961-12-02	0	81	2017-05-15	UC	renal pelvis	1	0	0	1	1	0	1	1	64.77	6.4	9.1	456	61	21	0.9	25	47	10	NA		1	Nivolumab	G+carbo	2017-06-26	PR	2017-08-21	2018-05-25	1	1	NA	NA	2018-06-08	0	NA
patient 15	1952-08-02	1	67	2019-02-20	invasive papillary urothelial carcinoma, high grade	kidney	1	0	1	0	0	1	2	1	54.6	12	15.2	195	77.3	16.6	1.31	27	32	NA	NA	S2019=07006	1	Durvalumab	NA	2019-12-04	PD	2020-03-02	2020-02-03	1	1	NA	(kidney pelvis ca) gem/cisplatin->RT->MVAC->SBRT->Gem/taxol	2021-12-31	0	0
2824012	1948-03-21	0	78	2017/12/9(CT)	squamous cell carcinoma vs UC (2017/12/11)	bladder	0	1	0	0	1	0	0	1	81.4	8.3	13	316	71.5	23.5	0.71	29	19	9.2	185		1	Nivolumab	Ipilimumab	2018-04-10	PR	NA	.	0	0	Fever	NA	2019-08-13	0	NA
2824199	1955-02-20	1	64	2019-11-20	UC	ureter	1	0	0	0	1	0	0	1	119.04	3.7	7	89	80.6	13.2	0.67		12	9			2	Durvalumab	G+C	2019-12-24	SD	2020-05-14	NA	0		fatigue	NA	2020-06-14	1	15
patient 16	1928-11-01	0	90	2006-08-14	infiltrating urothelial carcinoma with squamous differentiation	right ureter	1	1	0	0	1	0	0	3	130.8	5.8	10.4	148	68.2	24.2	0.45	21	12	NA	189	S2018=42144	1	Nivolumab	NA	2018-10-16	PR	2019-01-29	2019-06-26	0	1	diarrhea, weakness, fatigue	NA	2019-06-26	1	1
3047572	1944-05-30	1	62	2018-04-19	UC	Bladder	0	0	0	0	1	0	0	0	54.79	4.3	12	106	56.2	32.7	1.28	25	28	8.9	194		1	Atezolumab	G+C	2019-07-11	PD	2019-08-29	2019-09-09	1		Hiccup Constipation Fever Elevated liver function		2020-04-17	1	NA
patient 17	1955-10-14	1	63	2018-06-27	infiltrating urothelial carcioma, high grade	bladder	0	0	0	0	1	0	0	1	17.89	9.3	11.1	422	75	6	3.48	NA	NA	NA	NA	S2018=29528	1	Pembrolizumab	NA	2018-08-03	PD	2018-10-23	2018-12-26	1	1	mild fever	Gem/carbo, stivarga	2019-09-05	1	0
patient 18	1928-09-07	1	92	2020-03-04	invasive urothelial carcinoma with squamous differentiation	renal pelvis and bladder	2	1	0	1	1	0	1	1	51.6	6.8	9.8	364	70.2	21.1	1.3	22	34	NA	NA	S2020=07785	1	Pembrolizumab	NA	2020-06-19	PD	2020-08-03	2020-09-08	1	1	pneumonia	NA	2021-02-02	1	0
patient 19	1943-07-12	0	74	2017-05-24	infiltrating urothelial carcinoma, high grade	renal pelvis	1	0	1	0	0	1	2	1	53.4	8.8	11.7	249	73.5	19.6	1.01	23	17	8.9	183	S3017=20860	1	Atezolizumab	NA	2017-12-21	CR	2018-03-23	2022-07-05	0	0	constipation	.	2022-07-05	0	25
3484994	1958-02-28	0	70	2017/12/13(MRI)	UC (2017/10/05)	kidney	1	0	0	1	1	0	1	0	22.89	11.1	10.5	510	67.9	25.4	2.19	47	55	9.7	312		1	Atezolizumab	G/C/5FU	2018-04-12	PD	2018-05-24	2018-06-25	1	1	Anorexia Fatigue Fever Joint and muscle soreness and pain	NA	2018-08-09	1	NA
3502656	1937-08-22	0	42	2017/11/21(CT)	small cell carcinoma with UC (2016/12/14)	bladder	0	1	1	1	1	0	2	3	84.69	9.9	14.3	267	84.7	8.2	0.67	26	36	9	441		1	Pembrolizumab	RT	2017-12-11	PD	2018-01-02	NA	0	0	Short of breath Epigastragia	NA	2018-01-22	1	NA
3617261	1966/7/1	0	82	2016/04/15(CT)	UC (2015/10/28)	bladder	0	0	0	0	1	0	0	0	112.27	24.8	10.3	632	87	6.5	0.57	33	26	9.3	277		1	Durvalumab	Tremelimumab	2016-05-09	PD	2016-05-09	2016-06-03	1	1	Leg edema	NA	2016-07-17	1	NA
3793085	1951-03-04	1	63	2017-06-27	UC (2016/06/27)	bladder	0	0	1	0	1	1	2	0	77.68	7.8	14.8	217	60.3	25.4	0.97	20	20	9.7	199		1	Durvalumab	Tremelimumab	2016-07-21	PR	2017-06-21	2017-10-17	1	1	Muscle pain Epigastralgia Dyspnea Skin rash and icthing	G+C	2018-06-13	1	NA
patient 20	1937-06-04	0	80	2017-07-27	infiltrating papillary urothelial carcinoma, high grade	bladder	0	0	0	0	1	0	0	2	55.92	5.7	12.2	260	66.8	24.6	0.96	19	12	8.9	176	S2017=29963	1	Atezolizumab	NA	2017-08-31	CR	2019-09-12	2022-08-11	0	0	insomnia, skin itching	.	2022-08-11	0	NA
3905684	1940-05-23	0	85	2016-10-25	UC (no tissue)	bladder	0	0	1	0	0	0	1	1	64.85	7.8	13.7	207	63.7	26.3	0.85	26	21	9.5	191		1	Pembrolizumab	G	2016-12-22	SD	2017-05-20	2017-11-07	1	1	constipation Fatigue Fever AKI	G+C --> Docetaxel --> B-701	2019-03-15	1	NA
4945624	1965-02-12	0	81	2018-05-04	UC (2016/08/17)	bladder	0	0	0	0	1	0	0	0	48.87	3.8	8.6	301	63.4	26.8	1.16	15	7	9.3	138		1	Atezolizumab	G+C	2018-05-17	SD	2018-05-17	2019-03-21	1	1	Fever Diarrhea Constipation	GC	2022-09-22	0	4
patient 21	1938-07-01	1	81	2017-05-12	infiltrating papillary urothelial carcinoma, high grade	bladder	0	0	0	0	1	0	0	1	111.9	4	12.1	103	70.1	15.8	0.68	43	44	8.4	213	S2017=18298	1	Pembrolizumab	NA	2019-06-10	PR	2019-12-16	2022-02-21	0	1	poor appetite	NA	2022-02-21	1	0
5105654	1940-01-09	1	69	2019-01-11	invasive urothelial carcinoma, high grade	left ureter	1	0	0	1	1	1	2	0	27.2	3.9	10.5	132	64.2	26.5	2.32	20	19	9.2	299	S2019=02179	1	Atezolizumab	Gemcitabine	2019-12-05	SD	2020-01-16	2020-02-04	1	1	mild skin itching, fatigue	NA	2020-02-14	1	15
5108870	1956-02-24	1	84	2019-02-25	infiltrating papillary urothelial carcinoma, high grade	bladder	0	0	0	0	0	0	0	0	53	10100	11.6	282	75.6	17.3	1.35	16	NA	NA	NA	S2020=00826	0	Atezolizumab	GC	2020-01-10	CR	2020-04-06	NA	0	0	vomiting	.	2022-09-21	0	NA
5109337	1947-01-10	1	68	2017-01-25	metastatic carcinoma	right renal pelvis	1	0	1	0	1	1	2	1	40.48	9.4	10.8	326	77.9	10	1.4	37	22	9.7	303	F2017=00025	3	Atezolizumab	G/carbo	2017-10-12	PD	2017-11-01	2017-11-09	1	1	NA	NA	2017-11-18	1	15
patient 22	1948-10-27	0	69	2010-03-26	invasive urothelial carcinoma with micropapillary variant	left renal pelvis	1	1	0	0	1	0	0	1	10.465	8.9	11.2	241	64	24.9	4.12	38	48	NA	NA	S2016=49736	1	Pembrolizumab	NA	2017-10-05	PD	2017-12-08	2018-02-21	1	1	fever, diarrhea gr 2, Oral ulcer gr 2	NA	2018-04-01	1	NA
5231513	1941-09-22	1	76	2018-07-27	Invasive papillary urothelial carcinoma with squamous differentiation, high grade	left renal	1	1	0	0	0	0	0	0	49.292	4.3	11.6	126	56	28.5	1.39	16	13	.	.	S2020=16693	1	Pembrolizumab	FPMB	2020-03-04	PR	2020-04-15	2021-04-07	1	1	NA	.	2021-11-05	0	<10
5238906	1945/6/28	1	64	2020-12-16	papillary urothelial carcinoma, high grade	bladder	0	0	0	0	0	0	0	0	115	10.6	12.1	128	84.6	10.4	0.67	20	18	NA	NA	S2020=53564	0.5	Durvalumab	GC	2021-01-11	non PCR	2021/4/16	2021-09-23	1	1	hiccup,constipation	CMV, gem/carbo	2021-12-08	1	<10
patient 23	1937-04-23	1	81	2015-06-09	infiltrating urothelial carcinoma with squamous differentiation	bladder and kidney	2	1	0	0	1	0	0	2	31.5	9.7	9.7	304	75	14	2.04	NA	NA	8.2	NA	S2018=25557	1	Pembrolizumab	NA	2018-07-09	PD	2018-08-21	2018-09-24	1	1	NA	gem/carbo	2019-06-11	1	8
5290611	1937-12-24	0	67	2019-03-14	invasive urothelial carcinoma, poorly differentiated	left renal pelvis and ureter	1	0	0	1	1	0	1	3	30.71	190.1	9.4	533	96	1.2	1.61	23	8	9.2	698	S2019=10532	1	Pembrolizumab	gemcitabine	2019-03-29	PD	2019-04-04	2019-04-17	1	1	NA	NA	2019-04-20	1	100
5292534	1954-08-27	1	69	2019-06-11	infiltrating urothelial carcinoma, micropapillary variant, high grade	bladder	0	1	0	0	0	0	0	0	52.59	6.9	12.4	330	60.3	23.8	1.36	17	12	10	NA	S2019=46213	0	Atezolizumab	GC	2020-01-22	SD	2020-03-16	NA	0	0	anorexia, fatigue	NA	2021-03-11	1	< 10
patient 24	1942-07-01	0	75	2017-11-21	infiltrating urothelial carecinoma, high grade	right renal pelvis	1	0	1	0	1	0	1	0	58.77	10.5	13	136	68.2	21.6	0.93	NA	32	NA	NA	S2017=47401	1	Pembrolizumab	NA	2017-11-29	PD	2018-01-10	2018-01-19	1	1	headache, poor appetite	GC, Atezolizumab	2019-03-12	1	3
5350468	1943-06-11	1	59	2020-11-30	small cell carcinoma with UC (2016/12/14)	bladder	0	1	0	0	1	1	1	1	44.9	5.8	10.8	235	75.8	12.8	1.51	19	10	NA	237	S2020=50541	2	Atezolizumab	GC	2021-03-03	PD	2021-05-24	2021-05-24	1	1	Anemia	pembrolizumab/GC, EP	2021-11-08	0	NA
5378459	1952-11-21	1	72	2017-07-10	infiltrating urothelial carcinoma, high grade	right ureter	1	0	0	1	1	0	1	1	66.28	7.9	8.6	159	85.3	7.3	1.11	31	34	9.7	NA	S2018=30828	1	Pembrolizumab	GC	2018-08-13	PR	2018-10-11	2018-12-19	1	1	vomiting, Constipation	MVAC, pembrolixumab	2022-08-25	0	NA
5402848	1959-08-22	0	69	2019-06-14	invasive papillary urothelial carcinoma with squamous differentiation	rght renal pelvis	1	1	0	0	1	0	0	2	38.5	14.3	8.7	151	95	2.7	1.39	34	15	7	395	S2019=55849	1	Atezolizumab	GC	2020-06-05	PR	2020-11-02	2022-04-18	0	0	anorexia, hiccups, nausea	pembrolixumab	2022-08-30	0	30
5427363	1952-08-05	1	76	2021-08-12	Papillary urothelial carcinoma noninvasive, High-grade	bladder	0	0	1	0	1	0	1	1												S2021=30006	0	Pembrolizumab	EV	2022-04-21	PR	.	.	0	.	skin itching ,Pneumonitis	.	2022-09-27	0	70
patient 25	1940-07-15	0	78	2017-06-08	invasive papillary urothelial carcinoma	left renal elvis and ureter	1	0	1	0	1	0	1	2	50.68	5.6	9.3	223	83	8	1.05	20	NA	NA	NA	S2017=37600	1	Nivolumab	NA	2018-02-22	SD	2018-04-12	2018-04-02	1	1	dizziness	NA	2018-06-04	1	0
patient 26	1952-10-14	0	64	2016-12-20	infiltrating urothelial carcinoma	left renal pelvis	1	0	1	1	1	0	2	2	40.17	8.1	12.6	234	69.4	21.5	1.33	21	7	9.6	263	S2016=53135	1	Pembrolizumab	NA	2017-03-07	PR	2018-05-29	2018-09-04	1	1	fatigue, hiccups	Atezolizumab + gem	2019-03-26	1	0
5463755	1941-01-07	0	30	2016-05-11	urothelial carcinoma with squamous differentiation	bladder	0	1	0	0	1	1	1	2	67.78	9.5	8.4	189	87.6	5.8	0.82	14	10	11.4	239	S2016=18716	1	Pembrolizumab	GC	2017-03-03	PR	2017-07-27	NA	0	0	constipation, poor appetite	.	2022-09-01	0	85
5481217	1961-08-20	1	79	2016-12-22	infiltrating urothelial carcinoma with squamous differentiation	bladder	0	1	0	0	1	1	1	1	44	9.1	11.8	464	73.5	13.4	1.62	16	10	9.6	357	S2016=53324	1	Pembrolizumab	GC	2017-07-04	CR	2017-12-18	NA	0	0	nausea, vomiting, fatigue	.	2022-07-11	0	0
5612960	1978-06-12	1	52	2018-05-18	papillary urothelial carcinoma, high grade	bladder	0	0	1	0	1	0	1	0	80.09	7.9	15.6	290	72.1	19	1.02	17	11	NA	792	S2018=39975	1	Pembrolizumab	GC	2020-03-20	PD	2020-04-16	2020-12-14	1	1	Fair spirit	GC + Durva	2021-03-25	1	0
5648089	1945-09-18	1	66	2017-05-11	infiltrating urothelial carcinoma	left ureter	1	0	1	1	0	0	2	1	51.5	7.1	11.3	409	60.9	30.4	1.36	67	96	8.4	295	S2017=17935	1	Pembrolizumab	G/carbo	2017-05-23	PR	2017-10-30	2017-11-07	1	1	anorexia, fatigue	MVAC	2018-08-21	1	10
5658018	1949-07-01	1	35	2016-12-22	infiltrating urothelial carcinoma, high grade	right renal pelvis	1	0	1	0	1	0	1	1	29	4.2	7.9	123	68	5	2.28	50	19	7.8	NA	NA	1	Pembrolizumab	GC	2017-05-26	PD	2017-06-16	2017-06-04	1	1	weakness and fatique	NA	2017-06-21	1	NA
5660582	1963-11-18	0	86	2021-02-04	infiltrating urothelial carcinoma, high grade	renal pelvis	1	0	0	0	1	0	0	1	79.6	7	11.1	328	68.5	25.5	0.75	24	NA	9.1	NA	S2021=05463	0	Pembrolizumab	GC	2021-02-26	SD	2021-12-22	2021-12-24	1	1	peripheral neuropathy grade 1-2	MVAC->gem/taxol	2022-09-15	0	< 10
5768933	1945-07-01	0	67	2020-05-27	infiltrating urothelial carcinoma, high grade	bladder	0	0	0	0	0	0	0	1	62.64	6.6	11.8	269	59.3	31.4	0.88	17	11	9.1	NA	S2020=20916	0	Atezolizumab	GC	2020-06-12	PR	2020-10-06	2022-07-30	1	1	itching	Pembro+G	2022-09-16	0	70
5858274	1962-04-03	1	86	2016-11-01	infiltrating urothelial carcinoma with squamous differentiation	left ureter	1	1	0	0	1	0	0	0	49.37	9.6	12.6	350	75.1	17.5	1.47	24	16	8.9	229	S2016=46117	1	Durvalumab	Olaparib	2018-12-10	PD	2019-01-29	2019-01-28	1	1	NA	MVEC, weekly CMV, MVAC	2022-08-16	0	0
5944847	1943-12-15	0	65	2019-11-08	infiltrating urothelial carcinoma with squamous differentiation	bladder	0	1	0	0	0	0	0	1	9.3	12.7	9.5	177	82	5	4.56	NA	17	NA	NA	S2019=49965	0	Pembrolizumab	GC	2019-11-25	CR	2020-01-17	NA	0	0	hypothroidism	.	2022-08-19	0	20	yes	yes	143	42.7
patient 27	1937-05-10	1	81	2018-08-08	invasive urothelial carcinoma, high grade	ureter	1	0	0	0	1	1	1	1	55.1	9.7	13.2	216	77.8	13.4	1.24	22	29	NA	NA	S2018=32417	1	Pembrolizumab	NA	2018-08-27	PD	2018-11-05	2018-11-05	1	1	NA	GC-> pembro /GC	2020-07-18	1	0
patient 28	1956-02-08	1	62	2017-03-24	infiltrating urothelial carcinoma, high grade	bladder	0	0	0	0	1	0	0	0	37.46	6.1	12.6	173	52.9	34	1.84	27	23	9.2	NA	S2017=37036	1	Pembrolizumab	NA	2018-01-11	PD	2018-02-21	2018-02-04	1	1	poor appetite, skin rash	gem/carbo	2018-09-18	1	5
patient 29	1929-12-17	1	88	2013-10-16	infiltrating urothelial carcinoma with squmaous differentiation	bladder	0	1	0	0	1	0	0	1	23.1	11.3	8.9	279	80.2	15.2	2.63	34	19	NA	NA	S2013=41372	1	Pembrolizumab	NA	2018-01-22	PD	2018-01-22	2018-02-16	1	1	.	NA	2018-02-16	1	0
patient 30	1958-11-06	0	58	2016-05-17	infiltrating urothelial carcinoma	right renal pelvis	1	0	0	0	1	0	0	1	8.67	8.4	10.4	314	56.7	25	5.11	25	11	8.6	NA	S2016=19888	1	Pembrolizumab	NA	2016-06-22	CR	2017-01-09	2022-09-12	0	0	NA	NA	2022-09-12	0	5
6000949	1954-01-08	1	68	2021-12-27	Urothelial carcinoma, invasive, High-grade	Right renal pelvis	0	0	0	0	1	0	0	0	52.557	3.9	8.1	174	37.5	54.1	1.35	15	13	8.8	157	S2022=16803	0	Pembrolizumab	GC	2022-02-14	PR	2022-03-28	.	.	.	anemia	Gem/carbo	2022-09-20	0	>10
patient 31	1960-01-26	1	59	2019-01-29	invasive urothelial carcinoma with squamous differentiation	renal pelvis	0	1	1	0	1	0	1	0	9.84	4.7	10	193	46.5	39.9	5.91	20	16	8.9	NA	S2019=04755	1	pembrolizumab	NA	2019-04-02	SD	2019-09-16	2020-07-28	0	1	Skin lesion, nausea	Gem/Carbo	2020-10-29	1	90
patient 32	1948-04-07	0	70	2018-03-23	invasive urothelial carcinoma, high grade	left ureter	1	0	0	0	1	0	0	2	109.7	12.1	9.4	284	85.7	10.1	0.55	17	7	8.9	186	S2018=10993	1	Pembrolizumab	NA	2018-05-03	PD	2018-07-03	2018-07-04	1	1	NA	NA	2018-09-14	1	NA
6036117	1949-09-30	1	73	2017-04-15	infiltrating urothelial carcinoma, high grade	left ureter	1	0	0	0	1	0	0	0	53.31	5.4	13.5	172	61.8	28.9	1.33	26	27	9.6	138	F2019=00124	1	Pembrolizumab	G/carbo	2018-06-14	PR	2018-08-23	2019-07-16	1	1	skin rash, constipation	gem/carbo, pembro alone	2021-01-26	0	10
patient 33	1977-06-24	1	42	2019-01-18	invasive papillary urothelial carcinoma, high grade	renal pelvis	1	0	0	0	1	0	0	0	53.7	19.4	10.1	470	86.3	7.2	1.45	NA	NA	NA	NA	S2019=03093	0	Pembrolizumab	NA	2019-03-11	PR	2019-05-24	2022-09-03	0	0	NA	NA	2022-10-05	0	35
patient 34	1940-07-22	1	82	2018-10-08	Invasive papillary urothelial carcinoma with inverted growth, high grade	Left renal pelvis	1	0	1	0	0	0	1	1	12.774	12	9	148	84	10	4.45	22	20	.	245	S2018=41857	1	Pembrolizumab	NA	2022-04-14	PD	2022-05-26	2022-06-09	1	1	skin itching	gem/car	2022-09-22	0	<10
patient 35	1956-03-02	1	63	2019-06-26	invasive urothelial carcinoma with squamous differentiation	renal pelvis	1	1	0	0	1	0	0	1	39.8	8.2	7.4	304	69	14.3	1.74	15	15	.	.	S2020=05854	1	pembrolizumab	NA	2019-08-07	SD	2019-09-18	2020-05-06	1	1	NA	NA	2020-05-10	1	0
patient 36	1947-07-03	1	72	2018-11-27	urothelial carcinoma, high grade	bladder prostate urethra	0	0	0	0	1	0	0	0	47.46	7.6	14.4	154	82	8.7	1.46	19	13	8.7	193	S2018=49312	1	Durvalumab	NA	2019-01-03	CR	2020-12-29	2022-08-30	0	0	NA	.	2022-08-30	0	40
6140190	1935-12-21	0	83	2022-07-18	infiltrating papillary urothelial carcinoma	bladder	0	0	0	1	0	0	1	0	65.028	4.5	9.6	257	59.2	27.4	0.83	29	12	8.6	295	.	0	Pembrolizumab	EV	2022-08-18	.	.	.	.		Cough:Gr1, Thrombocytopenia:Gr1	.	2022-09-22	0	<10
6196492	1929-08-04	1	67	2019-07-18	infiltrating urothelial carcinoma, high grade	bladder	0	0	0	0	0	0	0	1	16.9	9.8	11.1	226	68.3	19.1	3.43	16	9	NA	NA	S2019=31113	1	Durvalumab	gemcitabine	2019-12-06	SD	2020-01-31	.	.	.	Cr deterioration	NA	2020-05-15	1	15
patient 37	1933-01-30	0	85	2017-11-13	infiltrating urothelial carcinoma with squamous differentiation	renal pelvis	1	1	0	1	0	0	1	1	19.95	4.9	10.1	141	75.1	17.5	2.32	53	23	9.1	464	S2017=07527	1	Pembrolizumab	NA	2017-12-21	PD	2018-02-02	2018-04-06	1	1	general weakness	NA	2018-06-26	1	NA
patient 38	1938-10-22	0	81	2017-09-27	infiltrating papillary urothelial carcinoma	left ureter	1	0	0	0	1	0	0	1	.	.	.	.	.	.	.	.	.	.	.	.	1	Atezolizumab	NA	2019-12-17	PD	2020-04-26	2020-04-26	1	1	.	pembro, gem/carbo, gem/taxol	2022-01-19	1	NA
6225246	1961-12-10	1	63	2020-10-27	Papillary urothelial carcinoma, high grade	bladder	0	0	0	0	0	0	0	1	73.916	5.6	12.9	185	62	26.6	1.03	36	26	NA	164	S2020=48349	0	Pembrolizumab	GC	2020-11-23	SD	2021-01-21	.	0	0	poor appetite, fatigue	.	2022-09-05	0	<5
patient 39	1948-07-28	0	72	2020-10-28	infiltrating urothelial carcinoma, high grade	left renal pelvis	1	0	1	1	1	0	2	1	66.6	10.5	9.7	364	81.9	11.6	0.84	19	14	.	.	S2020=44834	1	Pembrolizumab	NA	2020-11-04	PD	2020-12-16	2021-01-04	1	1	poor appetite	GC/durva, gem/taxol	2021-06-27	1	0
6313371	1954-08-14	0	68	2020-08-25	invasive papillary urothelial carcinoma, high grade and muscularis propria invoed	bladder	0	0	0	0	0	0	0	0	79.763	7.2	12.5	155	63.9	30.4	73	15	18	NA	NA	S2021=03516	0	Durvalumab	GC	2020-10-12	SD	2020-12-21	.	0	0	vomitin, hair loss	.	2022-04-18	0	NA
patient 40	1948-10-02	0	69	2017-10-31	UC (2017/02/21)	ureteral	1	0	1	0	1	1	2	NA	8.22	9.3	8.9	441	71.5	14.3	5.19	29	10	9.2	NA		1	Atezolizumab	NA	2017-11-09	PR	2019-03-05	2022-07-27	0	0	Fever Skin rash Leg edema Malaise Diarrhea	NA	2022-08-11	0	NA
6317839	1951-03-14	0	45	2021-04-28	urothelial carcinoma with squamous differentiation	left renal pelvis	1	1	1	0	1	0	1	2	40.5	13.1	9.8	239	88.8	5.7	1.3	NA	11	NA	NA	S2021=18361	1	Pembrolizumab	gem	2021-05-03	PD	2021-05-24	2021-06-08	1	1	appetite fair	pem/GC	2021-08-30	1	0
patient 41	1933-03-21	0	84	2017-07-13	UC (2016/12/06)	bladder	0	0	1	1	1	0	2	NA	59.65	13.3	8.9	412	82.7	9.8	0.9	35	21	8.5	NA		1	Pembrolizumab	NA	2017-08-01	PD	2017-08-01	2017-09-04	0	1	NA	NA	2017-09-04	1	NA
patient 42	1953-07-28	0	68	2021-04-17	UC	Ureter	1	0	0	0	1	1	1	3	35.347	17	9.3	208	85.6	4.8	1.47	NA	41	NA	NA		1	Atezolizumab	NA	2021-06-04	SD	2021-08-04	2021-08-31	0	1	edema, weakness	NA	2021-08-31	1	NA
patient 43	1959-08-06	1	58	2017/03/30(CT)	UC (2017/03/31)	bladder	0	0	0	1	0	0	1	0	93.85	5.6	14.2	202	77.9	15.8	0.84	27	32	9.3	185		1	Atezolizumab	NA	2017-05-09	PD	2017-06-27	2017-07-14	1	1	elevated liver function	taxol--> B-701	2018-12-24	1	NA
patient 44	1941-09-30	0	76	2016-10-06	UC	left kidney	1	0	1	0	1	0	1	1	76.3	4.2	10.5	377	61	25.6	0.74	23	9	9.2	261		1	Atezolizumab	NA	2017-11-02	CR	2018-12-04	2022-08-24	0	0	fatigue, fever	NA	2022-08-04	0	10
patient 45	1952-10-30	0	64	2013-11-08	right renal UC post Nx, lung/bone mets	kidney	1	0	1	1	0	1	3	NA	59.95	5.1	10	163	61.6	26.6	0.94	24	14	8.9	NA		1	Pembrolizumab	NA	2016-06-23	CR	NA	2017-06-12	1	1	weight loss	atezolizumab	2019-08-19	0	NA
patient 46	1959-06-01	1	57	2016-11-10	UC with squamous differentiation, high grade (2016/10/13)	bladder	0	1	0	0	1	0	1	3	65.98	18.4	11.4	419	78	9	1.14	41	32	9	161		1	Durvalumab	NA	2016-11-25	PD	2017-02-17	2017-01-16	1	1	Hematuria	G+C	2017-11-02	1	NA
6507584	1941-10-01	0	50	2020-10-08	infiltrating papillary urothelial carcinoma, high grade	renal pelvis	1	0	1	0	1	0	1	1	47.9	8.8	10.4	386	76.2	15.6	1.1	38	34	9.9	152	S2020=41408	1	Pembrolizumab	Lenvatinib / Placebo	2020-11-12	SD	2021-03-18	2021-03-22	1	1	proteinuria, elevated liver function	gem/cisplatin, MVCa	2022-03-09	1	NA
6565589	1958-11-15	1	77	2021-02-23	urothelial carcinoma with squamous differentiation	bladder	0	1	1	0	1	0	1	1	97.9	5.2	10.1	507	65	26.3	0.8	17	10	8.9	138	S2021=12483	1	Pembrolizumab	NA	2021-04-13	SD	on going	.	.	.	skin itching, Anemia:Gr1	.	2022-09-15	0	NA
6567624	1947-01-06	0	77	2017-08-02	invasive papillary urothelial carcinoma, high grade	right ureter	1	0	0	0	0	0	0	0	57.98	8.3	9.5	272	81.4	10.2	0.95	NA	16	NA	NA	S2017=31077	0	Pembrolizumab	Nivolumab	2017-08-22	PR	2017-09-29	NA	0	0	fever	.	2022-09-05	0	0
6607077	1950-08-20	1	67	2016-03-03	infiltrating urothelial carcinoma	bladder	0	0	0	0	1	0	0	0	70.45	8	14.1	312	64.2	27.1	1.05	31	33	9	NA	S2016=46741	1	Pembrolizumab	GC	2017-08-15	CR	2018-05-24	NA	0	0	adrenal insufficiency, AKI, neuropathy	.	2022-09-15	0	0
6637644	1977-12-28	0	71	2016-01-19	urothelial carcinoma, high grade	right ureter	1	0	0	0	1	0	0	0	65.48	4.3	12.3	142	65.6	22	0.95	26	16	9.4	176	S2016=24196	2	Pembrolizumab	GC	2017-01-26	PR	2017-08-18	2017-08-18	1	1	fatigue, Elevated AST/ALT	MVAC->aratinib->atezo/GC->gem /taxol->gem/taxol + ramucirumab->eribulin+ramucirumab	2018-06-03	1	15
6649906	1942-11-08	0	73	2017-10-25	infiltrating papillary urothelial carcinoma	left ureter	1	0	1	0	1	1	2	2	51.66	11.2	9	391	79	10	1.04	20	14	8.7	NA	S2017=43161	1	Pembrolizumab	G/carbo	2017-11-27	PR	2018-02-26	2018-03-05	1	1	skin itch, fatigue, Neutropenia, grade 4	NA	2018-03-05	1	NA
patient 47	1951-04-11	1	67	2017/09/04(CT)	UC	kidney	1	0	1	0	0	0	1	NA	68.41	2.8	12.6	217	71	13.8	1.08	26	18	9.2	282		1	Atezolizumab	NA	2017-11-02	SD	2018-01-04	2018-03-31	0	1	Face vitiligo Malaise Pruritis Dizziness	RT	2018-04-29	1	NA
6682849	1950-05-02	0	69	2020-03-25	poorly differentiated carcinoma	bladder	0	0	0	0	1	1	1	2	38.1	12.7	10.8	462	83.4	9.7	1.37	NA	7	8.9	NA	S2020=09481	1	Durvalumab	gemcitabine	2020-06-04	PD	2020-09-08	2020-08-11	1	1	skin itching, fever, Thyrotoxicosis	NA	2020-12-12	1	15
patient 48	1950-03-01	1	69	2018-09-03	UC, high grade	bladder	0	0	0	0	1	0	0	0	71.6	9.6	13.5	296	53.8	36.8	1.03	23	25	9.3	204		1	Nivolumab + Ipilimumab	NA	2018-10-09	PR	2019-03-28	2019-04-23	0	1	insomnia,diarrhea	NA	2019-04-23	1	30
patient 49	1955-10-23	1	63	2018-11-20	UC, high grade	kidney	1	0	0	1	1	1	2	1	133.5	31.3	12.1	598	86	6.7	0.61	15	11	11.9	195		1	Nivolumab + Ipilimumab	NA	2018-12-27	PR	2019-04-02	2019-04-18	1	1	anorexia,diarrhea,diarrhea	NA	2019-04-22	1	NA
6725124	1965-11-17	1	60	2022-04-22	urothelial carcinoma, invasive, High-grade	Right renal pelvis	1	0	0	0	1	0	0	1	45.594	8.4	14.9	279	63.8	26.9	1.58	26	33	9.6	213	S2022=17691	0	Pembrolizumab	EV	2022-05-26	SD	.	.	.		maculopapular drug eruption	.	2022-09-22	0	.
6738486	1940-11-17	0	65	2019-09-06	infiltrating urothelial carcinoma, high grade	bladder	0	0	0	0	0	0	0	0	98.32	5.6	13.3	259	72.1	21.9	0.59	NA	NA	NA	NA	S2019=39723	0	Pembrolizumab	GC	2020-03-03	cCR	2020-05-29	.	0	0	fever, oral ulcer	NA	2022-07-19	0	<10
6763044	1966-02-18	0	53	2019-12-18	infiltrating urothelial carcinoma with squamous differentiation	bladder	0	1	0	0	0	0	0	0	106.2	5.2	11.6	193	50.1	38.5	0.59	22	12	NA	NA	S2019=58582	0	Pembrolizumab	GC	2020-03-26	SD	2020-06-10	2020-07-02	1	1	nausea	GC->MVAC->Paclitaxel/Nivolumab	2021-08-11	1	2
6805245	1958-06-20	1	63	2019-06-27	infiltrating urothelial carcinoma	bladder	0	0	0	0	1	0	0	1	42.8	7.7	11.9	313	71.2	21.8	1.65	25	16	9.1	239	S2019=44276	1.5	Pembrolizumab	Lenvatinib / Placebo	2019-12-26	PR	2022-01-04	2022-06-13	1	1	constipation	weekly GP	2022-09-01	0	NA	0	0	162.8	65
patient 50	1960-07-28	1	59	2017-06-30	UC	bladder	0	0	0	0	0	1	1	1	63.81	6.1	12.7	268	56.2	30.7	1.17	49	51	9.2	212		1	Atezolizumab	NA	2019-05-02	PR	2019-07-25	2020-05-21	1	1	Elevated liver function	MVAC	2021-04-29	1	50
6824290	1950-07-20	0	66	2018-10-05	urothelial carcinoma, high grade	right renal pelvis	1	0	0	0	1	0	0	2	8.59	19.6	8.4	150	89	4	5.01	36	27	11.6	691	S2018=40271	1	Nivolumab	gemcitabine	2018-11-14	PR	2019-06-06	2019-10-19	1	1	abdominal fullness, ascites +++	Gem/carbo	2020-03-12	1	NA
patient 51	1948-09-20	1	72	2020-06-11	urothelial carcinoma, high grade	renal pelvis	1	0	0	1	1	0	1	0	51.07	11.8	12.8	278	83.4	9	1.37	36	17	9.2	228	.	1	Atezolizumab	NA	2020-06-19	PD	2020-10-05	2020-10-05	1	1	NA	Atezolizumab + Gem/carbo, MVA/Carbo+ atezolizumab, gem/taxol	2022-09-19	0	NA
6852096	1932-03-20	0	72	2019-11-22	invasive sarcomatoid UC with squamous differentiated	renal pelvis	1	1	1	0	0	0	1	1	24.35	.	.	.	.	.	1.94	.	.	.	.	S2019=52477	1	Durvalumab	gemcitabine	2020-02-24	PR	2020-05-24	2020-09-05	1	1	NA	NA	2021-10-04	1	90
6937127	1964-11-02	1	44	2019-07-31	infiltrating urothelial carcinoma with squamous differentiation	right renal pelvis	1	1	0	0	1	1	1	2	127.5	19.8	9.9	456	87	3	0.65	35	44	10.3	182	S2019=33223	1	Pembrolizumab	GC	2019-08-22	PD	2019-10-24	2019-11-08	1	1	cachexia, skin rash	MVAC, olaparib	2020-03-13	1	15	1	1	162	45
6955015	1955-06-09	0	63	2019-11-22	small cell carcinoma with UC (2016/12/14)	bladder	0	1	0	0	0	0	0	0	102.3	5.1	11.6	223	68.1	25.9	0.59	33	.	.	.	S2019=52314	0	Atezolizumab	GC	2019-12-20	CR	2020-01-31	.	0	0	dizziness, constipation	.	2022-09-26	0	10	0	0	148	53
patient 52	1953-04-23	1	69	2021-11-15	Urothelial carcinoma, invasive, High-grade	bladder	0	0	0	0	1	0	0	0	60.031	.	9.8	.	.	.	1.2	.	.	.	.	S2022=11619	1	Pembrolizumab	NA	2021-11-26	PD	2022-01-25	2022-02-19	1	1	NA	NA	2022-04-18	1	.
6981621	1950-04-20	0	66	2017-12-14	infiltrating urothelial carcinoma	left ureter	1	0	1	0	1	0	1	2	.	.	.	.	.	.	.	.	.	.	.	S2017=50811	3	Atezolizumab	GC	2018-11-16	PD	2019-01-18	2019-02-02	1	1	fever	NA	2019-05-07	1	0
patient 53	1942-08-01	1	76	2017-01-04	invasive urothelial carcinoma with squmaous differentiation	ureter	1	1	0	1	1	0	1	.	53.6	.	.	.	.	.	1.3	.	.	.	.	S2017=08607	1	Nivolumab	NA	2018-11-23	SD	2019-03-18	2019-06-03	1	1	NA	pembrolizumab, pembrol/GC	2020-09-09	1	.
patient 54	1950-05-04	1	71	2020-08-31	Infiltrating urothelial carcinoma, high grade	ureter	1	0	0	0	1	0	0	1	.	.	.	.	.	.	.	.	.	.	.	S2020=35405	1	Pembrolizumab	NA	2021-04-13	PR	2022-01-18	2022-01-08	0	0	.	.	2022-01-18	0	30
8488391	1961-01-30	1	72	2015-08-01	UC (no tissue)	kidney	1	0	1	1	0	0	2	0	55.14	4.9	11.7	174	69.8	19.5	1.34	33	31	9.2	263		5	Atezolizumab	G	2017-03-21	PD	2017-05-02	2017-05-19	1	1	Fatigue Emesis poor appetite tenderness neutropenic fever diarrhea	Pembrolizumab+ RT Ibrance Pembrolizumab+GC	2018-05-04	1	NA
8744718	1957-12-19	0	53	2020-11-20	UC	Ureter	1	0	0	0	0	0	0	0	59.413	5.1	13.1	203	59.1	35.6	0.95	18	16	9.3	242		1	Atezolizumab	G+C	2021-01-04	SD	2021-03-18	.	0		nausea, anorexia	OP+ adjuvant RT	2022-09-01	0	NA
8786598	1972-06-04	1	72	2017-08-03	UC	bladder and kidney	2	0	0	0	1	0	0	1	9.2	9.6	8.5	146	82	10	6.57	26	16	10	NA		2	Atezolizumab	Taxol	2017-09-21	SD	2017-11-02	2017-11-20		1	Anemia Tarry stool	Colon ca	2021-07-14	1	NA
8792861	1942-05-01	1	85	2020-10-27	UC	ureter	1	0	1	0	0	0	1	0	35.66	8.1	10.9	287	75.9	15.8	1.84	20	26	8.8	NA		1	Pembrolizumab	G+Carbo	2020-11-06	PR	2021-04-21	.	.		neck swelling, skin rash, constipation	NA	2022-09-27	0	<10
8908049	1971-10-29	0	68	2020-05-28	carcinosarcoma	uterus	1	1	1	0	1	1	2	1	148.09	3.1	8.8	258	74.5	17	0.45	15	13	9.5	NA		1	Pembrolizumab	paclitaxel+carbo	2020-10-23	PR	2021-06-16	2021-02-19	1		chill and sweating	Ifossphamide/ adrimycine->pembro/lenvatinib	2021-09-30	0	NA
patient 55	1960-03-07	1	58	2014-01-10	urothelial carcinoma	bladder	0	0	0	0	1	0	0	.	12.35	.	.	.	.	.	4.87	.	.	.	.	S2014=01318	1	Pembrolizumab	NA	2017-10-02	SD	2017-10-25	2018-05-29	1	1	NA	docetaxel, nivo, GC	2022-09-12	0	0
patient 56	1987-04-01	0	30	2017-03-02	papillary urothelial carcinoma, high grade	left renal pelvis	1	0	1	0	0	0	1	0	68.24	6.6	12.7	320	61.8	30.7	0.96	21	26	9.9	.	F2017=00023	1	Pembrolizumab	NA	2017-03-20	SD	2017-09-04	2017-09-20	1	1	NA	GC, Erdafitinib	2022-09-26	0	0
patient 57	1938-09-24	1	79	2017-05-02	invasive papillary urothelial carcinoma with squamous differentiation	renal pelvis	1	1	0	0	1	0	0	0	44.12	6	11.7	239	59	26.1	1.53	18	16	8.8	162	S2017=16474	1	Pembrolizumab	NA	2017-06-05	PD	2017-08-10	2017-08-02	1	1	NA	NA	2018-11-21	1	0
9278295	1953-10-18	0	63	2022-04-01	papillary urothelial carcinoma, invasive, high grade	Left renal pelvis	1	0	1	0	0	0	1	0	62.887	3.8	11.6	213	59.9	30.7	0.89	20	12	8.9	198	S2022=17296	1	Pembrolizumab	EV	2022-05-26	PR	.	.	.	.	maculopapular drug eruption (Gr1), peripheral neuropathy (Gr1), diarrhea(Gr1)	.	2022-09-15	0	<10
9279205	1953-08-02	0	57	2013-02-25	infiltrating urothelial carcinoma	bladder	0	0	0	0	1	0	0	0	60.567	7.4	15.9	238	57.6	28.6	1.21	20	23	9.5	167	S2015=19616	1	Durvalumab	Tremelimumab	2016-07-22	SD	2016-12-09	2017-01-03	1	1	NA	gem/taxol, MVAC	2020-07-21	1	.
patient 58	1966-10-01	0	52	2018-05-22	invasive papillary urothelial carcinoma with squamous differentiation	renal pelvis	1	1	0	0	1	0	0	0	41.5	12	10.6	420	.	.	1.34	.	.	.	.	F2018=00055	1	Pembrolizumab	NA	2018-10-12	PR	2019-08-12	2022-07-04	0	0	NA	.	2022-07-04	0	70
9292998	1940-12-06	0	77	2013-02-21	infiltrating urothelial carcinoma, high grade	Left ureter	1	0	0	0	1	0	1	0	33.328	7	11.8	273	63.9	22.7	1.5	20	15	.	.	S2021=46861	1	Pembrolizumab	GC	2021-11-26	SD	2022-02-14	.	0	0	Constipation	.	2022-09-20	0	<10
9320088	1958-11-19	1	62	2016-10-04	infiltrating papillary urothelial carcinoma, high grade	right ureter	1	0	1	0	1	0	1	0	35.1	9.4	13.3	200	75.4	17.6	1.97	26	24	9.5	222	S2016=41270	1	Atezolizumab	G/carbo	2016-12-13	SD	2017-06-19	2017-07-15	0	1	febrile neutopenia	NA	2017-07-15	1	0
9340678	1952-10-27	0	70	2019-03-22	invasive urothelial carcinoma	right renal pelvis	1	0	0	0	1	0	0	1	67.6	8.3	11.4	323	57	34.5	0.84	20	11	10	232	S2019=11966	1	Durvalumab	NA	2019-05-02	SD	2020-01-31	2020-01-31	1	1	Extremities edema, Diarrhea	Gem/carbo, Pembrolizumab, MVAC	2021-03-07	1	15
9396384	1950-10-29	0	43	2017-08-04	urothelial carcinoma	right renal pelvis	1	0	1	0	1	1	2	1	69.54	8.8	7.9	238	82	9.9	0.82	31	24	8.3	422	S2017=31377	1	Pembrolizumab	GC	2017-08-14	PR	2018-02-27	2018-03-22	1	1	fatigue gr 2, poor appetite, gr 1, vomiting	Pembrolizumab + Gemcitabine	2018-05-03	1	0
patient 59	1953-02-27	1	66	2018-12-07	invasive urothelial carcinoma, high grade	ureter	1	0	0	0	1	0	0	.	31.5	16.7	9.6	236	91	6	2.11	.	.	.	.	S2018=50945	1	Pembrolizumab	NA	2019-02-01	PD	2019-05-20	2019-05-11	1	1	NA	NA	2020-02-16	1	99
9432541	1953-01-10	0	64	2022-01-06	Infiltrating urothelial carcinoma	Right renal pelvis	1	0	1	0	1	0	1	1	80.314	5.7	9.3	272	74.6	16.5	0.72	21	12	8.1	251	S2022=01077	0	Pembrolizumab	EV	2022-02-09	SD	2022-08-08	2022-08-16	1	1	anemia(grade 2), Hyponatremia(Gr3)	GC	2022-09-19	0	.
9458086	1947-11-11	1	53	2018-11-09	infiltrating papillary urothelial carcinoma, high grade	bladder	0	0	0	0	1	0	0	0	73.66	7.6	13.8	322	71.4	21.9	1	22	20	.	180	S2018=46760	1	Atezolizumab	GC	2018-12-03	CR	2019-04-26	.	0	0	hiccup, constipation	.	2022-09-28	0	0
patient 60	1984-07-26	0	35	2019-04-01	infiltrating urothelial carcinoma, high grade	bladder	0	0	1	0	1	0	2	1	5.6	3.8	7.6	130	64	20	8.12	.	.	.	.	S2019=25917	1	Pembrolizumab	NA	2019-06-24	PR	2019-10-18	2022-12-06	0	0	mild fever.	.	2022-12-06	0	0
9544272	1943-03-26	0	43	2018/03/13(CT)	UC(2018/02/02)	kidney	1	0	0	1	0	0	1	0	80.26	15.3	11	385	82.9	14.3	0.71	18	12	8.6	194		1	Atezolizumab	G	2018-06-20	PD	NA	2018-08-07		1	Fever Fatigue Weakness	NA	2018-08-07	1	0
patient 61	1935-03-12	1	86	2020-09-10	infiltrating papillary urothelial carcinoma, high grade	renal pelvis	1	0	0	1	1	1	2	2	34.62	4.9	101	193	61.4	29.9	1.86	22	10	9.3	237	F2020=00094	1	Durvalumab	NA	2020-10-27	PR	2021-02-02	2021-02-18	1	1	NA	.	2021-08-24	1	<5
9633057	1953-10-13	0	78	2017/09/06(CT)	UC	ureter	1	0	0	0	1	0	0	0	71.19	6.1	11.3	214	65	22.1	0.81	25	17	NA	NA		2	Pembrolizumab	RT	2017-10-13	PD	2017-12-22	2018-01-05		1	Fatigue Anorexia Leg edema Neuropathy	Taxol	2018-05-14	1	NA
9727115	1928-10-07	1	59	2018-10-22	infiltrating papillary urothelial carcinoma, high grade	renal pelvis	1	0	1	0	0	1	2	2	61.59	4.8	9.8	85	80.9	7.2	1.05	24	18	7.9	207		1	Pembrolizumab	G+RT	2019-04-11	PD	2019-06-13	2019-06-20	1	1	Fatigue Anorexia Diarrhea Rash	NA	2019-12-24	1	< 10
patient 62	1954-02-07	1	67	2020-10-07	infiltrating papillary urothelial carcinoma with focal micropapillary feature, high grade	bladder	0	1	1	0	1	0	1	1	107	7.7	11.5	182	72.5	17.4	0.73	.	.	.	.	F2020=00103	1	Pembrolizumab	NA	2020-10-07	PR	2020-12-24	2021-02-01	0	0	NA	.	2021-02-01	0	< 10
patient 63	1935-01-19	1	86	2020-09-15	UC	Ureter	1	0	1	0	1	0	1	0	35.954	9.6	11.2	165	84.1	4.4	1.8	22	16	9.1	280		1	Atezolizumab	NA	2020-10-08	PD	2021-01-28	2020-12-07	1	1	malaise,poor intake	NA	2021-06-22	0	>10
patient 64	1954-03-27	0	65	2019-03-11	UC with squamous differentiation	bladder	0	1	1	0	1	1	2	3	10.01	23.6	8	347	91.5	1.5	4.42	10	5	9.3	NA		1	Nivolumab	NA	2019-05-17	PD	.	2019-05-26	1	1	NA	NA	2019-05-26	1	10
10047346	1937-03-15	1	75	2018-08-27	UC	bladder	0	0	0	0	0	0	0	1	44.81	2.6	8.7	110	61.1	26.7	1.5	27	17	8.2	324		2	Atezolizumab	G	2018-11-13	PR		2019-12-10	0	1	mucositis, fatigue, anemia, pulmonary embolism	NA	2019-12-10	1	0
10063410	1965-08-20	1		2013-12-20	UC	ureter	1	0	0	0	1	0	0	0	59	8.5	11.6	188	63.9	24.1	1.32	22	24	10.1	182		1	Atezolizumab	GC	2019-08-09	PD	2019-10-18	2019-10-26	1	1	NA	EV	2022-09-22	0	5
10133698	1954-08-23	1		2018/01/18(bone)	UC (2018/01/18)	renal pelvis	1	0	0	0	0	1	1	1	48.23	5.5	10.7	216	89	4.7	1.47	23	15	8.4	1090		1	Atezolizumab	Carbo /RT	2018-01-30	NA	2018-01-30	NA		1	NA	G+CDDP	2018-04-30	1	NA
10312987	1957-06-15	1		2017-09-11	UC	renal pelvis	1	0	0	0	1	1	1	1	47	4.8	14.2	141	77.9	12.4	1.62	82	143	8.8	306		2	Pembrolizumab	G	2019-10-28	PD	2020-03-23	2020-03-30	1	1	elevated liver function	MVAC, 5FU/gem,Trastuzmab Deruxtecan	2022-09-08	0	1
patient 65	1937-12-23	0	82	2019-07-02	UC	renal pelvis	1	0	1	0	1	1	2	4	33	20.7	10.8	544	85.4	10.9	1.51	22	13	NA	NA		1	Atezolizumab	NA	2019-07-15	PD	2019-08-05	2019-09-16	1	1	Tachycardiia Hyponatremia Hypothyroidism UTI	NA	2019-09-16	1	NA
patient 66	1947-09-15	1	73	2014-09-06	UC	bladder	0	0	0	1	1	0	1	2	73.2	8.3	9.8	269	70.3	17.2	1	32	32	.	.		1	Pembrolizumab	NA	2020-04-30	PD	2020-06-11	2020-06-23	1	1	NA	NA	2020-07-29	1	20
10780596	1954-08-06	0		2016-05-18	UC	Ureter	1	0	0	0	1	0	0	1	41.348	4.4	13.5	204	57.6	33.9	1.29	36	22	9.1	278		1	Atezolizumab	RT	2020-09-18	PR	ongoing	2021-07-24	1		flank soreness	NA	2022-09-16	0	7
10811936	1953-07-15	1		2017-07-03	UC	kidney	1	0	0	0	0	0	0	0	25	5.2	10.3	178	68.4	22.3	2.62	33	11	9.5	227		1	Pembrolizumab	G	2017-08-03	PR	2018-03-08	2019-07-10	1	1	Skin rash Hair loss Evelated Amylase Leg edema	rechallenge pem/gem	2020-05-21	0	NA
10922057	1979-02-03	0		2021-06-16	UC	bladder	0	0	0	0	0	0	0	1	74.35	5.4	13.1	211	34	57	0.84	21	35	NA	NA		1	Nivolumab	G+C	2021-07-01	NED	2021-09-03	.	0		skin lesion	NA	2022-08-11	0	0.08
patient 67	1932-03-15	1	87	2018-03-29	UC	ureter	1	0	0	0	1	0	0	0	30.06	7.6	12.7	369	75.1	17.5	1.75	27	10	9.5	200		1	Atezolizumab	NA	2019-06-13	CR	2022-03-10	2022-08-25	0	0	NA	NA	2022-08-25	0	10
patient 68	1965-12-12	1	54	2015-09-04	UC	bladder	0	0	0	0	1	0	0	0	60.75	8	13.4	279	73.3	17.9	1.24	19	14	9.5	171		1	Pembrolizumab	NA	2019-07-05	PR	2020-06-12	2020-01-07	1	1	NA	G+Carbo	2022-09-30	0	20
20296548	1938-03-25	1		2004-07-08	UC	renal pelvis	1	0	0	0	1	1	1	0	70.8	4.7	11.5	305	72.2	22.9	1.01	20	10	9.1	189		1	Atezolizumab	GC	2018-10-11	PD	2019-03-14	2018-12-17	1	1	Vomiting Fatigue Anorexia Elevated Amylase	GC + atezo	2020-10-08	0	> 10
20346175	1943-07-28	0		2018-07-26	UC	bladder	0	0	1	0	1	0	1	0	99.1	3.3	11.9	150	68.1	21.4	0.59	27	24	9.1	205		2	Atezolizumab	GC	2019-03-14	SD	2019-08-15	2019-11-06	1	1	fatigue, neutropenia	MVAC	2020-04-03	1	0
20461374	1945-01-11	0		2005-05-16	papillary urothelial carcinoma, low grade	bladder	0	0	0	0	1	0	0	0	72.4	3.5	7.9	245	66.1	24.3	0.78	15	9	8.1	167		1	Atezolizumab	G	2019-05-08	PD	2019-08-12	2019-10-21	1	1	NA	NA	2019-11-15	1	12
20484465	1956-09-15	1		2016-07-19	UC (2016/07/19)	bladder	0	0	1	1	0	0	2	0	58.92	17.4	10.2	640	83	9	1.25	23	21	9.7	168		1	Durvalumab	Tremelimumab	2016-09-13	PD	2016-11-09	2016-11-04		1	Abnormal liver function Fever Discharge	G+C	2017-10-16	1	NA
patient 69	1950-04-10	1	68	2018-04-04	UC	ureter	1	0	0	0	0	0	1	1	43.8	6.7	9.8	339	76.5	12.6	1.58	24	13	9.5	158		1	Atezolizumab	NA	2018-08-22	PD	2018-10-24	2018-11-01	1	1	Skin rash Constipation Fatigue	G+carbo	2018-12-12	0	NA
20892233	1950-09-02	1		2016/7/13(CT)	UC (2016/03/303)	kidney	1	0	1	1	0	0	2	NA	90.18	5	7.8	279	58	28.9	0.85	18	12	NA	212		2	Nivolumab	Paclitaxel	2017-01-03	PD	2017-03-14	2017-03-13		1	Fatigue Muscel aching Elevated liver function	NA	2017-04-04	1	NA
patient 70	1940-09-23	0	79	2019-09-07	UC	renal pelvis	1	0	0	0	1	0	0	0	35.69	7	9.8	320	75	16.9	1.42	24	10	9.3	339		1	Pembrolizumab	NA	2019-10-03	PR	2019-12-26	2020-07-30	1	1	NA	NA	2021-01-29	1	NA
21351368	1928-03-24	1		2017-05-05	UC (2017/05/05)	bladder	0	0	0	0	1	0	0	1	58.13	5.3	9.4	222	49.9	41.7	1.18	19	14	8.6	NA		1	Pembrolizumab	G+C	2017-06-19	PD	2017-07-14	2017-08-11		1	Fair spirit	NA	2017-09-22	1	0
patient 71	1966-10-11	1	54	2019-03-12	UC	bladder	0	0	0	0	1	0	0	0	41.93	13.9	10.2	700	84	10.4	1.71	17	22	9.5	397		1	Atezolizumab	NA	2020-05-14	PR	.	2021-01-07	1	1	fatigue, constipation	MVAC	2022-01-10	1	10
patient 72	1946-02-12	0	73	2019-04-01	UC	renal pelvis	1	0	1	0	1	0	1	0	63.82	7.5	13.7	250	61.8	30.3	0.87	27	30	9.5	180		1	Atezolizumab	NA	2019-05-17	PD	2019-07-26	2019-08-23	1	1	fatigue, poor appetite	G	2019-10-31	1	< 10
21782561	1962-08-20	0		2014-10-08	UC with papilloma like	renal pelvis	1	1	0	0	0	0	0	0	30	5.9	11.6	187	69	21.7	1.75	19	11	9.2	199		2	Atezolizumab	G	2019-11-04	SD	2020-03-09			.	Induration Neutropenia Tachycardia Elevated Cr	proton therapy and atezo	2022-09-21	0	NA
21802023	1969-08-29	1		2020-08-28	UC	bladder	0	0	0	0	0	0	0	0	48.96	2.6	13.7	197	27	51	1.51	22	16	8.6	175		1	Atezolizumab	G+C	2020-11-05	SD	ongoing	.	0		fatigue, neutropenia, rash	.	2022-09-07	0	NA
patient 73	1956-12-10	1	62	2018-05-01	UC	ureter	1	0	0	0	1	0	0	0	75.72	6.7	12.3	240	72.1	18.5	1	16	16	8.9	244		1	Pembrolizumab	NA	2019-04-18	PD	2019-07-02	2019-07-11	1	1	Bell's palsy Skin rash Elevated liver function	NA	2019-07-23	0	10
21851950	1952-08-30	0		2017/3/17(CT)	UC (2017/03/15)	kidney	1	0	1	0	0	0	1	0	57.64	4.2	10.6	143	57.2	28.6	0.97	34	23	9.4	256		1.5	Avelumab	G+C	2017-09-29	CR	ongoing	.	0	0	Diarrhea Fatigue	NA	2022-09-22	0	0
patient 74	1949-03-10	0	71	2018-03-13	UC	ureter	1	0	0	0	1	0	0	1	41.48	5	10.3	320	67.9	21.8	1.27	23	18	9.2	194		1	Atezolizumab	NA	2020-04-23	PR	2021-04-08	2021-04-08	1	1	fatigue, URI	NA	2021-05-27	0	10
21878023	1960-03-24	1		2016/05/23(CT)	UC (2016/06/30)	kidney	1	0	1	1	1	1	3	0	64.49	12.1	14.9	235	71.8	19.6	1.17	38	30	9.8	633		1	Durvalumab	Tremelimumab	2016-07-23	PD	2016-08-22	2016-09-08		1	Constipation Skin rash、itching Abnormal liver function	G+C	2017-03-30	1	NA
21898185	1956-02-07	1		2016/05/24(CT)	UC (2016/06/07)	kidney	1	0	1	0	1	0	1	0	82.88	20	9.1	342	89.5	4	0.93	20	16	8.4	342		1	Durvalumab	Tremelimumab	2016-07-11	PD	2016-07-11	2016-08-04		1	abdomen fullness and pain leg swelling skin rash dyspnea weakness	NA	2016-09-09	1	NA
21934300	1951-07-08	0		2016-05-17	UC (no tissue)	ureter	1	0	0	0	1	0	0	2	62.84	3.7	10.3	171	74.1	15.5	0.9	23	13	9.6	225		1	Atezolizumab	RT	2016-10-13	PD	2017-01-19	2017-01-18		1	Malaise	palliative RT	2017-03-10	1	NA
21934528	1959-05-01	1		2016-06-23	UC	bladder	0	0	0	1	0	0	1	0	46.31	8.8	10	312	79.9	11.2	1.32	35	28	9.2	270		4	Atezolizumab	G	2019-03-09	PD	.	2019-04-03	1	1	SOB Fatigue Jaundice	NA	2019-04-13	1	NA
patient 75	1927-11-25	0	91	2013-01-02	UC	bladder	0	0	0	1	1	0	1	1	48.07	5.3	12.4	260	72.1	19.8	1.07	27	14	NA	NA		1	Atezolizumab	NA	2018-10-09	PD	2018-12-04	2018-12-19	1	1	Skin rash Elevated liver functopn Depreeive	NA	2018-12-19	1	NA
patient 76	1944-05-20	1	76	2017-10-27	UC	bladder	0	0	0	0	1	0	0	0	74.36	6.8	13.9	226	54.4	34.5	0.98	20	9	9.1	197		1	Atezolizumab	NA	2019-12-05	PR	2020-08-13	2020-08-13	1	1	Fatigue Vomiting Ilues	NA	2020-09-14	0	> 10
21997230	1931-05-09	1		2017/8/25(CT)	UC (2017/09/05)	bladder	0	0	1	0	0	0	1	0	77.82	4	10.2	243	63.5	23.6	0.92	17	<5	9.3	260		1	Avelumab	G+C	2018-03-30	SD	2020-10-22	2020-11-05	1	1	Dermatitis	G/carbo	2022-09-29	0	NA
patient 77	1936-12-15	1	83	2016-06-25	UC	bladder	0	0	1	0	1	0	1	1	74.8	7.9	12	307	68.7	16.9	0.96	27	11	9.2	251		1	Nivolumab	NA	2020-02-20	PD	2020-03-05	2020-03-17	1	1	UTI, Pneumonia	NA	2020-03-17	0	<10
22055199	1949-05-08	1		2018-03-20	UC	right renal pelvis	1	0	1	0	1	0	1	0	55	8.8	13.5	354	69.3	22.3	1.29	17	8	9.9	160		1	Durvalumab+Tremelimumab	G+Carbo	2019-05-28	PD	2019-09-16	2019-09-23	1		fatigue,anemia,anorexia,insomnia	NA	2019-11-16	1	NA
patient 78	1952-02-18	1	67	2017-02-17	UC	ureter	1	0	0	0	1	0	0	0	38.56	10.6	9.4	447	82.7	12.5	1.77	29	27	9.2	598		1	Atezolizumab	NA	2019-06-13	PD	2019-09-05	2019-08-14	1	1	leg edema, weakness	NA	2020-01-26	1	0
patient 79	1952-12-18	0	67	2019-03-26	UC	ureter	1	0	0	0	1	0	0	0	31.69	4.8	9.9	221	43.4	39	1.62	24	15	9.1	183		1	Pembrolizumab	NA	2019-09-23	PR	2019-12-20	2022-10-21	0	0	fatigue	NA	2022-10-21	0	50
22096554	1945-07-28	1		2019-01-08	UC	bladder	0	0	1	1	0	1	3	1	11.423	5.6	8.7	336	58	13	4.3	14	12	8.3	249		1	Atezolizumab	G	2020-09-28	PD	2020-09-28	2020-11-04	1		fatigue,mild dyspnea,poor intake	NA	2021-02-07	1	<10
22137436	1951-05-05	0		2010-12-26	UC	Ureter	1	0	0	0	1	0	0	NA	50.155	3.7	9.5	177	27	42	1.08		10				1	Atezolizumab	cisplatin+etoposide	2020-08-06	PR	2021-10-20	2021-03-05	1		n/v,neutropenia	E+carbo	2022-09-23	0	NA
patient 80	1944-05-11	1	76	2017-09-15	UC	bladder	0	0	0	0	1	0	0	0	37.11	6.7	11	229	58.3	33.7	1.79	27	13	9	253		1	pembrolizumab	NA	2020-05-07	CR	2020-05-07	2020-09-03	0	0	Elevated Cr Myopathy Elevated liver function	NA	2020-09-03	0	100
22152525	1952-11-08	1		2019-09-12	UC	Ureter	1	0	0	0	1	0	0	0	44.481	3.8	13.5	204	46.2	39.9	1.56	NA	15	NA	NA		2	Pembrolizumab	Taxotere+carbo	2020-12-16	SD	2021-02-17	.	.		netropenia gr2,diarrhea	.	2022-09-28	0	NA
22158122	1964-04-28	1		2019-06-17	NA(cytology:atypical urothelial cells)	renal pelvis	1	.	0	1	1	0	1	0	77	8.6	8.4	617	82	8.8	1.01	14	7	10.4	374		2	Atezolizumab	RT	2019-07-18	PR	2020-03-31	2020-06-15	1	1	skin rash	NA	2021-02-20	1	NA
patient 81	1958-12-18	0	63	2021-02-20	urothelial carcinoma, micropapillary variant	renal pelvis	1	1	0	0	1	0	0	0	74.6	5.3	12.6	160	56.1	34.8	0.78	24	25	9.4	189	.	0	Avelumab	NA	2021-07-01	SD	2021-12-02	2022-04-07	1	1	fatigue	MVAC	2022-09-12	0	13
22171030	1970-03-19	1		2019-09-06	UC	kidney	1	0	1	1	1	0	2	1	98.06	20	11.6	600	80	13	0.83	19	22	8.4	267		1	Durvalumab	G+C	2019-10-15	PD	2019-11-04	2019-12-03	1		skin rash,chest tightness	NA	2019-12-18	1	NA
22190063	1981-07-20	0		2020-02-11	Adenocarcinoma	Gallbladder	1	1	1	1	0	0	2	0	118.08	4.9	5.4	333	70.3	19.9	0.57	26	22				1	Nivolumab	GEMOX	2020-03-09	CR	2020-08-07	.	0		general arthralgia, fever	TS-1 maintenance	2022-09-27	0	NA
patient 82	1946-08-19	1	75	2021-02-25	urothelial carcinoma, high grade	renal pelvis	1	0	1	0	1	0	1	1	42	8	11.4	185	76	9	1.6	23	NA	NA	NA	F2021=00108	0	Avelumab	NA	2021-11-25	PD	2021-12-02	2022-01-23	1	1	poor appetite	NA	2022-01-26	1	0
patient 83	1954-07-18	0	68	2022-04-01	Urothelial carcinoma, invasive, high-grade	left renal pelvis	1	0	1	0	1	1	2	0	33.25	6.2	9.5	238	55.8	29.8	1.55	20	20	.	.	S2022=14292	0	Avelumab	NA	2022-09-05	PD	2022-09-19	2020-09-19	1	1	.	.	2022-10-24	0	<10
patient 84	1939-11-05	1	82	2021-01-07	Urothelial carcinoma, invasive, high-grade	bladder	0	0	0	0	1	0	0	0	29.573	8.8	10.7	242	62.4	26.7	2.15	22	14	.	151	S2021=01012	0	Avelumab	NA	2021-07-29	SD	2021-11-11	2022-09-26	1	1	NA	.	2022-09-26	0	<10
22239464	1946-10-12	0		2021-03-31	UC	kidney	1	0	1	0	1	0	1	1	81.576	17.7	8.7	368	86.9	5.1	0.7	25	17	9.7	198		0	Pembrolizumab	NA or GC?	2021-07-01	.	2021-07-01	.	.		.	NA	2021-07-13	0	5
patient 85	1976-11-12	0	45	2021-03-17	urothelial carcinoma, high grade	bladder	0	0	0	0	1	0	2	0	100.348	8.7	11.3	285	57.8	33.6	0.64	19	20	.	204	S2021=11065	0	Avelumab	NA	2021-08-18	SD	2022-04-18	2022-05-06	1	1	bil hand itching and rash and pain	GC/Avelumab	2022-12-14	0	<10
22244190	1953-07-31	1		2020-07-07	papillary UC, high grade	Ureter	1	0	0	0	1	0	0	2	85.261	12.1	8.1	514	80	7	0.89	64	57	8.2	280		1	Atezolizumab	G+C	2020-08-05	PR?	2021-01-27	2021-02-22	1		anemia, thrombocytopenia,weakness	NA	2021-02-25	1	<1
patient 86	1938-02-05	1	83	2015-06-30	UC	bladder	0	0	0	0	1	0	0	1	9.734	3.5	7.7	41	67.6	17	5.62	12	12	7.4	185		0	Pembrolizumab	NA	2021-04-20	PD	2021-09-23	2021-10-27	1	1	fatigue,pain,anemia , skin rash	hospice	2022-02-15	0	5
patient 87	1956-04-02	1	65	2020-09-14	UC	bladder	0	0	0	0	1	0	0	0	52.591	8.8	14.6	244	56.5	34.4	1.36	20	24	9.2	245		0	Atezolizumab	NA	2021-06-03	PR	2021-10-28	2022-12-15	1	1	skin itcing,dry mouth	NA	2022-12-15	0	0.05
39125422	1945-09-23	0		2017/10/13(CT)	UC (2017/10/20)	ureteral/kidney	1	0	0	0	1	0	0	NA	110.97	5.1	7.8	34	69	7	0.54	12	<5	6.7	NA		0	Pembrolizumab	G+C	2017-12-14	PD	2018-01-04	2018-01-09		1	Vomiting Abdominal pain Fever Muscle soreness Nausea	NA	2018-01-21	1	NA
39143496	1982-03-04	0		2017-12-29	UC (2017/12/29)	kidney / cervical ca	1	0	0	0	1	0	0	0	108.92	11.1	8.8	445	73.8	13.6	0.62	21	10	9.4	NA		0	Pembrolizumab	G+C	2018-01-23	PD	2018-01-23	2018-03-10		1	Anorexia Fatigue Fever	NA	2018-04-02	1	85
patient 88	1942-08-28	1	78	2020-03-09	UC	bladder	0	0	0	0	1	0	0	2	49	9.9	12.7	185	63.8	23	1.4	13	8	9.2	211		0	Atezolizumab	NA	2020-12-29	SD	2021-03-02	2021-09-03	1	1	abd fullness, skin lesion	hospice	2022-01-13	1	>10
50005249	1952-01-10	1	70	2022-03-28	Papillary urothelial carcinoma, High-grade	Left renal pelvis	1	0	1	0	1	0	1	1	50.102	5.7	11.6	234	55	18	1.4	27	24	8.9	238	S2022=13249	0	Pembrolizumab	EV	2022-04-21	PR	.	.	.	.	kin rash with itching (Gr1),Peripheral neuropathy:Gr 1	.	2022-09-20	0	.
51008626	1961-11-02	0	58	2020-02-19	urothelial carcinoma, high grade	kidney	1	0	0	0	1	0	0	2	74.7	6.1	11.1	215	77.5	13.3	0.79	18	10	9.6	194	S2020=05714	0	Pembrolizumab	Lenvatinib	2020-03-26	PD	2020-03-31	2020-05-11	1	1	intestinal obstruction	Gem/carbo	2020-07-10	1	0
patient 89	1948-12-22	1	69	2017-09-05	UC	bladder	0	0	1	0	1	0	1	0	69.27	5.5	13.4	208	58.1	30.1	1.06	21	21	9.5	188		0	Atezolizumab	NA	2017-11-03	PR	NA	2022-09-28	0	0	Constipation ileus Dizziness Diarrhea Fatigue Abnormal thyroid function	NA	2022-09-28	0	NA
patient 90	1943-12-29	0	77	2019-05-29	UC	bladder	0	0	1	0	1	0	0	0	61.5	6.6	10.1	158	50.5	31.1	0.89	16	12	9	254		0	Atezolizumab	NA	2021-04-08	PD	2021-06-10	2021-07-01	1	1	fatigue	MVAC->trial	2022-09-22	0	<5
60124385	1972-02-16	0		2022-01-25	Papillary urothelial carcinoma, invasive, High-grade	bladder	0	0	0	0	1	0	0	0	2.664	12.9	10.4	261	83.6	8.2	14.58	20	5	10.5	174	S2022=03986	0	Avelumab	Gem/carbo	2022-02-22	.	2022-03-08	.	.	.	hepatitis grade 3	.	2022-04-13	1	<10
patient 91	1950-10-15	1	71	2020-11-13	UC	kidney	1	0	0	0	1	0	0	1	107.6	9	8.2	257	87.9	6.4	0.72	14	14	7.7	184		0	Atezolizumab	NA	2021-05-05	NA	2021-06-17	2021-07-05	0	1	constipation,pain,fatigue	NA	2021-07-05	1	0.05
60129359	1953-12-25	1	65	2018-12-26	infiltrating papillary urothelial carcinoma, high grade	bladder	0	0	0	0	0	0	0	0	86.91	5.6	15.3	241	60	26.8	0.88	19	27	.	.	S2018=54041	0	Nivolumab	GC	2019-01-14	PR	2019-05-06	.	0	0	NA	.	2022-09-19	0	0
60222864	1949-12-28	1	69	2017-03-17	invasive urothelial carcinoma	right ureter	1	0	1	0	1	0	1	1	37.6	5.5	11.7	192	60.8	27.8	1.8	17	16	9.5	211	.	0	Pembrolizumab	Gem/carbo	2018-09-15	PD	2018-10-25	2018-11-07	1	1	NA	gem/taxol	2019-09-11	1	NA
patient 92	1971-05-01	0	50	2020-03-04	UC	bladder	0	0	0	0	1	0	0	3	39.8	3.8	11.1	235	80.3	12.6	1.4	16	9	9.7	208		0	Atezolizumab	NA	2021-04-15	PD	2021-07-29	2021-08-19	1	1	poor intake	hospice	2021-09-11	0	5
60281343	1935-09-20	0	86	2021-11-17	carcinoma with squamous differentiation	bladder	0	1	1	0	1	0	1	0	143	7.1	11.5	238	69.2	22.1	0.42	24	12	.	.	S2021=45432	0	Nivolumab	GC	2021-11-23	PD	2022-02-18	.	1	1	NA	.	2022-05-30	0	.
patient 93	1942-01-04	1	77	2018-06-22	UC	pelvic	1	0	1	0	0	0	1	0	41.5	16.1	10.1	334	57.8	6.9	1.5	36	26	10.4	1341		0	Avelumab	NA	2018-12-14	PD	2018-12-27	2019-01-11	1	1	hypercalcemia,hyponatremia,elecated CK,anemia	NA	2019-02-06	1	NA
patient 94	1943-11-03	0	77	2020-01-06	UC	Kidney	1	0	1	1	1	1	3	0	50.8	5.3	11	236	71.9	14.1	1.05	20	24	8.8	270		0	Pembrolizumab	NA	2020-10-15	PD	2020-11-26	2020-12-16	1	1	.	NA	2021-06-28	1	<1
60328721	1949-09-06	0	70	2020-02-24	invasive urothelial carcinoma	right renal pelvis	1	0	0	0	1	1	1	1	81.4	5.5	10.2	280	66.4	23.4	0.7	23	17	.	.	F2019=00131	2	Durvalumab	gemcitabine	2019-12-09	PD	2020-01-13	2020-01-02	1	1	poor appetite	NA	2020-02-14	1	0	0	1	152	47
60365216	1948-09-08	1		2017-08-21	invasive papillary urothelial carcinoma with squamous differentiation	left ureter	1	1	0	0	1	0	0	1	52.85	4.2	11.6	204	61.4	27.2	1.34	20	17	8.6	NA	S2017=33841	1.5	Pembrolizumab	G/carbo	2017-10-19	CR	2019-10-22	NA	0	0	adrenal insufficiency	.	2022-09-27	0	0
patient 95	1954-03-01	0	67	2020-11-09	UC	bladder	0	0	0	0	1	0	0	0	7.899	3	9.9	79	73.6	22.1	5.4	19	15	9.8	NA		0	Atezolizumab	NA	2021-04-22	SD	ongoing	2022-09-15	0	0	fatigue	.	2022-09-15	0	<10
patient 96	1947-02-02	0	71	2017-06-23	UC (2017/06/23)	kidney	1	0	1	1	1	1	3	1	73.9	5.7	9.7	327	71.4	21.5	0.77	24	18	9.1	181		0	Atezolizumab	NA	2017-11-24	NA	2017-12-15	2017-12-28	1	1		NA	2018-01-31	1	NA
patient 97	1946-09-04	1	73	2019-10-01	infiltrating urothelial carcinoma, micropapillary variant, high grade	bladder	0	1	0	0	1	0	0	1	59.75	5.6	13.4	288	62	23.9	1.19	NA	NA	NA	NA	S2020=17737	0	Pembrolizumab	NA	2020-02-17	SD	2020-03-20	2020-08-17	1	1	bil low legs edema	pembrolizumab/GC	2021-10-29	0	10
60437241	1950-05-04	0		2020-11-03	Infiltrating urothelial carcinoma, high grade	bladder	0	0	0	0	0	0	0	0	46.719	14.9	10.2	359	84.1	8.4	1.17	29	23	9.2	192	S2021=14725	0	Atezolizumab	GC	2021-04-30	PR	2021-09-27	2022-03-23	1	1	poor appetite, anemia	Atezo/GC, GC	2022-08-29	0	.
60519306	1945-06-20	1	75	2020-03-25	Small cell carcinoma with UC (2016/12/14)	renal pelvis	1	1	0	0	1	0	0	0	27.72	6.9	10.8	178	58.5	29.2	2.31	28	.	NA	NA	S2020=10907	0	Pembrolizumab	Gemcitabine	2020-04-21	SD	2020-06-24	2020-07-31	1	1	NA	GC, Gem/Carbo+Durvalumab	2022-09-12	0	2
60538285	1955-03-20	1	65	2012-12-26	infiltrating urothelial carcinoma	bladder	0	0	0	0	0	0	0	0	64.45	4.9	14.8	146	63.4	26.3	1.14	15	18	.	.	S2020=06896	0	Pembrolizumab	GC	2020-03-04	SD	2020-04-15	2020-07-02	1	1	NA	.	2022-09-08	0	<10
patient 98	1968-11-07	1	48	2016-08-24	invasive papillary urothelial carcinoma, high grade	left ureter	1	0	0	0	1	0	0	1	59.98	7.8	10.8	211	80.3	9.1	1.28	NA	21	NA	NA	NA	0	Pembrolizumab	NA	2016-12-23	PD	2017-01-12	2017-01-18	1	1	pain and soreness	NA	2017-02-11	1	NA
patient 99	1949-02-01	1	69	2016-10-26	invasive papillary urothelial carcinoma	right ureter	1	0	0	1	1	0	1	1	46.4	7.1	12.7	166	67	19.5	1.22	25	24	9.3	223	S2017=07903	0	Atezolizumab	NA	2017-12-11	PD	2018-01-02	2018-03-31	1	1	neuropathy, fatigue	gem/carbo	2018-06-17	1	0
patient 100	1952-10-01	0	64	2015-09-17	invasive papillary urothelial carcinoma, high grade	right renal pelvis	1	0	1	0	0	0	1	0	.	.	.	.	.	.	.	.	.	.	.	.	0	Pembrolizumab	NA	2017-01-18	PD	2017-05-05	2017-05-05	1	1	dizziness	GC, nivolumab	2020-01-30	1	0
patient 101	1932-01-08	1	86	2017-03-08	UC	bladder	0	0	0	1	0	1	2	1	46.51	6.1	9.7	250	67.5	21.2	1.44	NA	16	NA	NA		0	Pembrolizumab	NA	2017-09-25	SD	2017-11-06	2017-12-04	0	0	fatigue	NA	2017-12-04	0	55
patient 102	1957-07-28	1	60	2013-10-23	infiltrating papillary urothelial carcinoma	bladder	0	0	0	0	1	0	0	0	66.19	3.3	10.1	171	50.9	28.5	1.1	20	13	9.2	241	S2017=00103	0	Pembrolizumab	NA	2017-05-16	SD	2017-07-20	2017-11-17	1	1	NA	Pembro + MTX->MVAC	2018-05-03	1	0
60660900	1962-08-26	1		2014-12-12	infiltrating papillary urothelial carcinoma, high grade	bladder	0	0	0	0	0	0	0	0	63.86	7	13.1	186	61.8	28.1	1.18	NA	31	NA	NA	S2017=07410	0	Atezolizumab	GC	2018-03-19	CR	2019-12-02	2020-03-03	1	1	.	.	2022-09-19	0	25
patient 103	1952-04-04	0	65	2017-03-30	urothelial carcinoma	right renal pelvis	1	0	0	1	1	1	2	1	5.6	6.7	9.6	182	67.1	18.3	7.3	22	12	9.4	.	S2017=11847	0	Pembrolizumab	NA	2017-08-18	PR	2018-03-23	2018-03-22	1	1	fatigue	Pembro+gem, Nivo+gem	2022-09-27	0	0
60689305	1949-09-04	1	70	2015-06-05	infiltrating urothelial carcinoma	bladder	0	0	0	0	1	0	0	0	73.8	11.5	11.5	410	77.3	14.9	1	14	22	.	.	S2015=34676	0	Pembrolizumab	GC	2019-07-10	PR	2019-09-09	2020-04-23	1	1	NA	nivolumab/GC	2020-10-28	1	1
60707319	1945-07-14	1	75	2016-05-20	infiltrating urothelial carcinoma, high grade	bladder	0	0	0	0	1	0	0	2	70.21	3.9	9.1	137	80.4	11.6	1.03	17	10	8.5	.	S2020=54554	0	Durvalumab	GC	2021-01-07	NA	2021-01-07	2021-01-26	1	1	NA	NA	2021-01-26	1	< 10
patient 104	1968-08-02	1	53	2020-04-01	UC	bladder	0	0	1	0	1	0	1	1	52.579	10.3	10.7	436	63.7	26.9	1.41	16	8	9.4	208		0	Pembrolizumab	NA	2021-05-12	PD	2021-08-04	2021-08-04	1	1	mucositis	MVAC	2022-09-21	0	12
patient 105	1957-12-15	1	63	2020-09-15	UC	bladder	0	0	1	1	1	1	3	2	45.176	12.5	10.1	508	81	9	1.56	13	7	9.2	168		0	Atezolizumab	NA	2020-11-12	PD	2021-01-14	2021-01-18	1	1	hematuria	MVAC->G+Carbo	2022-01-18	1	>10
60728337	1958-09-01	1	58	2016-08-04	infiltrating urothelial carcinoma	bladder	0	0	0	0	1	0	0	0	77.37	8.2	13.1	177	72.5	17.5	0.99	17	18	9.2	NA	S2016=32265	0	Pembrolizumab	GC	2017-06-01	CR	2018-09-25	2018-08-31	1	1	adrenal insufficiency, hypothyroidism	MVAC	2020-04-07	1	25
patient 106	1955-01-03	1	66	2020-02-19	mucinous adenocarcinoma	bladder	0	1	1	0	1	0	1	0	44.09	6.7	10.3	303	56.5	32.5	1.58	21	13	9.4	257		0	Pembrolizumab	NA	2020-12-26	PD	2021-11-24	2021-12-09	1	1	abd fullness	MVACarbo, wkly paclitaxel	2022-09-21	0	>10
60756780	1961-03-07	1	56	2017-07-18	invasive urothelial carcinoma	bladder	0	0	1	0	1	0	1	0	63.86	6.7	12.5	248	73.7	19.8	1.18	20	14	NA	NA	.	0	Pembrolizumab	GC	2017-08-24	CR	2017-11-14	NA	0	0	NA	.	2021-05-19	0	NA
patient 107	1953-11-30	0	66	2018-12-22	UC	renal pelvis	1	0	1	1	0	0	2	0	55.47	4.8	12.1	179	66.4	21.2	1	24	24	9.3	195		0	Pembrolizumab	NA	2019-06-11	CR	2021-04-06	2022-07-19	0	0	NA	NA	2022-07-19	0	60
60960558	1971-07-04	1	47	2018-01-04	invasive urothelial carcinoma with sarcomatoid and clear variant	left renal pelvis	1	1	1	0	1	0	1	0	59.45	6.1	13.6	190	57.9	31.1	1.29	10	16	9.7	178	.	0	Durvalumab	Olaparib	2019-06-06	PD	2019-08-29	2019-09-20	1	1	Insomnia Gr 1, Common cold Gr 1	MVAC, gem/taxol	2020-10-28	1	NA
patient 108	1955-05-19	1	66	2019-12-25	UC	bladder	0	0	1	0	1	1	2	0	56.228	4.8	12.6	154	56.1	34.5	1.28	29	23	8.8	201		0	Atezolizumab	NA	2020-11-24	PD	2021-01-26	2021-01-26	1	1	fatigue,muscle soreness,poor appetite	NA	2021-02-23	1	12
patient 109	1948-09-09	0	72	2019-04-25	UC	bladder	0	0	0	0	1	0	0	0	85.53	7.1	12.8	234	71.5	22.1	0.68	13	11	9.1	189		0	Atezolizumab	NA	2021-01-07	PR	2021-12-23	2022-01-13	1	1	right femur pain	GC	2022-08-23	0	<10
60979908	1951-09-24	1	68	2019-04-26	infiltrating urothelial carcinoma, high grade	bladder	0	0	0	0	0	0	0	0	57.97	7.2	15.4	217	56.4	32.8	1.24	22	16	9.8	159	S2020=22566	0	Pembrolizumab	GC	2019-06-04	PR	2019-07-23	NA	0	0	mild constipation	.	2022-04-03	1	NA
60995568	1957-10-22	0	62	2019-12-18	invasive papillary urothelial carcinoma, high grade	kidney	1	0	0	0	1	0	0	1	43	5.2	11.2	376	69.8	21.3	1.26	16	20	9.4	173	S2019=56751	0	Pembrolizumab	NA	2020-02-06	PD	2020-03-26	2020-03-19	1	1	Nausea G1, Vomit G1,Herpes(right waist area) G1	GC, MVCa, gem/taxol	2021-02-18	1	0
61009131	1957-08-01	0	63	2020-01-07	urothelial carcinoma, high grade	bladder	0	0	0	1	1	1	2	1	122.2	8.8	10.5	176	75.4	16.4	0.51	53	67	.	.	S2020=01326	1	atezolizumab	GC	2020-01-15	PD	2020-03-05	2020-03-05	1	1	vomiting, diarrhea, nausea	nil	2020-03-06	1	100
61009460	1972-07-06	1	47	2020-03-20	infiltrating urothelial carcinoma with squamous differentiation	bladder	0	1	0	0	1	0	0	0	77.95	11	13.9	295	63	26	1.02	15	17	.	.	S2020=10249	0	Pembrolizumab	GC	2020-03-20	PR	2020-05-04	2020-09-21	1	1	NA	GC, MVAC	2021-11-11	0	< 10
patient 110	1977-06-21	1	44	2020-07-14	UC	bladder	0	0	0	1	1	1	2	0	71.96	3.7	11.3	262	74.9	19.5	1.11	27	47	9.1	126		0	Nivolumab	NA	2021-03-23	PD	2021-05-04	2021-05-11	1	1	constipation,ileus,fever	MVAC	2021-09-07	1	<1
61025534	1969-05-18	1	51	2020-08-27	Infiltrating urothelial carcinoma	bladder	0	0	1	0	1	0	1	1	80.64	8	15.3	225	65.5	18.8	0.98	39	37	9.8	455	.	0	Pembrolizumab	Lenvatinib	2020-10-05	SD	2020-12-22	2020-12-23	1	1	diarrhea, myositis, hypertension, proteinuria, AKI	GC, MVAC, gem/taxol	2022-08-01	0	NA
61035662	1955-07-09	1	65	2021-01-25	urothelial carcinoma	renal pelvis	1	0	1	0	1	0	1	0	46.8	9.3	14.6	246	68	19.7	1.5	20	30	9.5	.	S2021=39519	0	Atezolizumab	Gem	2021-01-21	PD	2021-04-01	2021-04-08	1	0	NA	GC, Carboplatin+Gemzar, Docetaxol/Nivolumab	2022-09-26	0	IC <5
61038148	1949-10-24	1	71	2021-02-25	urothelial carcinoma, high grade	renal pelvis	1	0	0	1	1	0	1	1	17.8	33.1	8.6	664	95	1.3	3.42	27	17	8.6	209	S2021=07318	0	avelumab	gem/carbo	2021-03-11	PD	2021-05-20	2021-06-23	1	1	skin itching ,poor sleep	GC, radiotherapy	2022-01-18	1	20
61056675	1941-10-22	1	80	2021-10-26	Urothelial carcinoma, invasive, micropapillary variant, High grade	renal pelvis	1	1	0	0	0	0	0	1	60.58	4.3	12.7	109	63.5	27.7	1.16	30	18	9.1	238	S2021=41672	0	Pembrolizumab	EV	2022-01-06	PR	.	.	0	0	Hyponatremia:Gr3	.	2022-09-26	0	<10
patient 111	1954-05-22	0	63	2016-11-02	UC (2016/11/02)	kidney	1	0	1	0	1	0	1	NA	52.93	4.8	11.7	146	43.4	45.3	1.05	40	22	9.5	296		0	Atezolizumab	NA	2017-09-14	PD	2017-11-16	2017-11-18	1	1	Fever Fatigue Muscle soreness Poor appetite Peripheral neuropathy	NA	2018-01-04	1	NA
99021266	1953-10-01	1																									0											2018-08-21	1	NA
10024368	1958-10-05	0		2014-12-31	UC	renal pelvis	1	0	0	0	1	1	1	1	7	7.2	7.4	158	77	4	5.83	25	18	8.7	458		0	Pembrolizumab	RT	2017-10-20	NA			0	0	NA	NA	2018-12-27	0	NA
10787905	1965-07-20	1		2019-08-20	UC	bladder	0	0	0	0	0	0	0	0	103.73	7.3	14.2	282	64	23.2	0.78	28	42	9.4	NA		0	Pembrolizumab	GC	2019-09-18	CR	2019-11-20	2020-07-06	1	1	skin rash, acnes	NA	2022-09-07	0	NA
10834177	1973-10-11	0		2018-01-25	UC	ureter	1	0	0	0	1	1	1	0	92.43	5	9.7	179	67.1	24.1	0.69	15	NA	NA	NA		0	Pembrolizumab	RT	2018-03-21	PR	2018-08-03	NA	0	0	cough, dizziness	NA	2022-08-12	0	NA
patient 112	1934-05-21	1	83	2015-12-18	infiltrating urothelial carcinoma with squamous differentiation	ureter	1	1	1	0	1	0	1	0	61.3	4.7	13.6	180	54.4	32.1	1.14	26	26	9.5	.	S2015=51306	0	pembrolizumab	NA	2017-02-09	PR	2021-08-03	2020-02-18	1	1	Skin tiching, Constipation	.	2022-09-19	0	3
patient 113	1951-04-17	1	66	2015-11-23	infiltrating urothelial carcinoma	bladder	0	0	0	0	1	0	0	0	28.59	5.4	9.9	246	.	.	2.3	.	.	.	.	S2016=45995	0	Pembrolizumab	NA	2016-12-20	CR	2017-02-24	2022-09-19	0	0	NA	.	2022-09-19	0	30
patient 114	1944-06-28	1	74	2014-04-15	infiltrating urothelial carcioma, high grade	bladder	0	0	0	0	1	1	1	1	23.6	6.3	7.1	175	74	17	2.65	15	9	8.8	.	F2018=00075	0	Pembrolizumab	NA	2018-09-04	PR	2020-05-06	2020-05-21	1	1	fatigue G2, anorexia G2, rectovesical fistula	taxol, Atezolizumab	2020-08-20	1	85
patient 115	1949-01-28	1	68	2014-07-02	infiltrating urothelial carcinoma with squamous differentiation	renal pelvis	1	1	0	0	1	1	1	1	.	.	.	.	.	.	.	.	.	.	.		0	Pembrolizumab	NA	2017-05-22	SD	2019-11-08	2020-08-11	1	1	nausea, vomiting	GC/pembro, pembro	2020-10-12	1	0
patient 116	1945-11-17	1	72	2016-04-21	invasive urothelial carcinoma with squamous differentiation	left ureter cancer	1	1	1	0	1	0	0	0	36.8	8.4	9	222	71	13	1.71	17	12	9.6	235	S2016=21751	0	Atezolizumab	NA	2017-10-26	PD	2017-12-28	2018-01-09	1	1	NA	Atezolizumab + Gem/carbo, MVAC, Gemcitabine/endoxan	2018-07-03	1	10
1793379	1932-12-10	0		2018-09-14	UC	bladder	0	0	0	0	0	0	0	1	11.73	14.7	9.6	192	94	1	3.66	14	10	8.3	NA		0	Atezolizumab	RT	2019-09-20	SD	2020-02-05	2020-02-05	1	1	Hypokalemia elevated liver function	NA	2020-03-09	1	NA
20020805	1938-01-02	1		2014-09-06	UC	bladder	0	0	1	1	1	0	2	1	54.79	6.9	11.3	227	79.1	8.2	1.26	184	54	NA	922		0	Pembrolizumab	G	2019-10-28	PD	2019-10-28	2019-11-12	.	1	NA	NA	2019-11-12	1	10
patient 117	1966-04-15	0	53	2018-07-23	UC	renal pelvis	1	0	0	0	1	0	0	0	70	12.4	11	255	72.9	18.3	0.85	18	9	9.1	237		0	Atezolizumab	NA	2019-04-18	PD	2019-06-25	2019-06-27	1	1	NA	taxol	2020-04-01	1	20
patient 118	1948-02-10	0	72	2019-07-01	UC with squamous differentiation	bladder	0	1	0	0	1	0	0	0	148.31	8	11.1	317	74.3	11.3	0.42	20	17	8.3	177		0	Pembrolizumab	NA	2020-04-14	PR	2020-05-26	2020-08-19	1	1	NA	NA	2021-04-17	1	60
20532614	1956-07-03	1		2019-04-14	UC	bladder	0	0	0	0	0	0	0	0	32.41	5.8	12.2	166	73.7	20.1	2.08	NA	21	NA	NA		0	Pembrolizumab	GC	2019-06-05	PR	2019-08-07	.	0	0	Constipation neutropenia	NA	2019-10-22	0	< 10
patient 119	1934-04-21	1	85	2018-11-13	UC	bladder	0	0	1	1	1	1	3	1	7.83	5	9.8	55	77.3	13.5	6.76	26	8	8.9	NA		0	Nivolumab	NA	2019-03-11	NA	2019-04-29	2019-05-19	1	1	pneumonia	NA	2019-05-19	1	> 10
patient 120	1952-10-16	1	68	2019-11-08	SCC	bladder	0	1	1	0	1	0	1	0	74.31	5.1	10.2	194	72	16	1	13	8	9.2	175		0	Atezolizumab	NA	2020-04-23	PD	2020-06-04	2020-06-05	1	1	NA	MVAC	2020-09-01	0	25
20777623	1936-01-28	0		2014-03-19	UC	ureter	1	0	1	0	0	0	1	0	55.37	5	12.7	169	61.8	30.5	0.96	NA	NA	NA	NA		0	Pembrolizumab	taxotere/carboplatin	2019-11-01	SD	2020-01-10	2020-04-08	1	1	mucositis, pneumonnitis	NA	2020-05-17	1	0
20801868	1972-08-24	1		2010-08-17	adenocarcinoma	bladder (urachus)	0	1	1	0	1	0	1	0	73.6	5	14	300	42	46.4	1.08	NA	31	NA	NA		0	pembrolizumab	FOLFIRI	2018-05-04	PD	2018-05-25	2018-06-22	1	1	NA	folfiri+sorafenib	2020-12-07	0	NA
2095793	1953-11-20	1		2015-03-23	Mucinous adenocarcinoma	bladder	0	1	0	0	0	0	0	1	69.36	7.3	14.5	199	68.2	22.9	1.07	31	24	8.8	260		0	Atezolizumab	RT	2018-09-06	CR	2018-11-29	2020-01-16	1	1	Fatigue elevated ALT/AST diarrhea Constipation	GC + atezolizumab	2021-12-30	0	20
patient 121	1961-01-10	1	59	2019-03-28	UC	bladder	0	0	1	0	1	0	1	0	45.11	5.8	12.8	298	65.8	21.9	1.58	15	11	9.4	143		0	Atezolizumab	NA	2020-05-05	CR	2022-03-22	2022-07-26	0	0	Elevated Cr Pyuria	NA	2022-07-26	0	20
21104472	1933-09-28	1		2020-02-24	UC	bladder	0	0	1	1	1	1	3	2	47.94	12.4	8.3	111	84.7	4.7	1.4	36	80	8.3	262		0	Pembrolizumab	GC	2020-03-31	NA		2020-04-26	1	1	NA	NA	2020-04-26	1	50
21369981	1935-08-22	1		2019-12-12	UC	bladder	0	0	0	0	1	0	0	1	99.22	10.6	14.4	222	82.3	12.1	0.75	19	12	8.8	252		0	Pembrolizumab	RT	2020-01-09	PD	2020-05-08	2020-03-13	1	1	NA	NA	2021-07-09	1	NA
21679409	1954-12-07	1		2013-10-04	UC	bladder	0	0	0	0	1	0	0	2	82.83	3.2	11.3	91	68.3	26.3	0.92	15	16	8.3	161		0	Pembrolizumab	RT + Docetaxel	2018-10-08	PD	2019-06-20	2018-11-19	1	1	malaise, eye ptosis	NA	2019-07-31	1	NA
patient 122	1950-06-18	1	69	2018-04-04	UC	ureter	1	0	0	0	1	0	0	0	41.28	5.2	14.6	192	61.4	26.4	1.66	24	8	9.5	236		0	Atezolizumab	NA	2019-07-18	PD	2019-08-29	2019-09-12	1	1	NA	docetaxel	2020-04-28	0	<10
patient 123	1942-07-02	0	77	2016-08-02	UC	bladder	0	0	0	0	1	0	0	0	5.11	7.4	8	201	75.9	14.3	7.69	28	11	8.6	425		0	Durvalumab	NA	2019-12-26	PR	2020-01-09	2021-03-02	0	0	NA	NA	2021-03-02	0	NA
21972945	1966-03-20	1		2017-03-19	UC	bladder	0	0	0	1	1	1	2	1	35.47	8	8.7	300	81.4	7.6	1.99	18	8	9	372		2	Pembrolizumab	Taxotere/cisplatin + RT	2018-04-03	CR	2018-08-31	.	0	0	Herpes Zoster Dry cough	NA	2022-09-22	0	NA
patient 124	1953-08-17	0	63	2014-12-15	UC	renal pelvis	1	0	1	1	1	0	2	0	28.97	5.4	10.1	126	39	47	1.77	62	56	8.7	NA		0	Pembrolizumab	NA	2016-10-01	PD	2016-11-17	2016-11-15	1	1	Diarrhea, anemia	MVAC	2016-12-23	1	NA
22016410	1943-04-25	0		2018-09-06	UC	bladder	0	0	0	0	1	0	0	0	30.89	8.2	10.7	232	60.5	27.3	1.62	27	10	9	360		0	Atezolizumab	RT	2019-07-01	NA				1	pancytopenia, septis shock	NA	2019-08-22	1	< 10
22054966	1962-04-01	1		2017-03-16	UC	renal pelvis	1	0	0	0	1	0	0	0	58.66	8.9	11.7	359	70.5	12.6	1.27	28	21	NA	199		0	Pembrolizumab	GC	2018-03-23	PD	2018-05-09	2018-06-05	1	1	skin rash	B-701	2018-09-06	1	NA
22068851	1979-01-17	1		2018-07-24	poorly differentiated carcinoma	renal pelvis	1	0	1	0	1	1	2	0	73.37	133.9	10.3	279	78.7	1	0.94	24	20	8.5	320		0	Atezolizumab	RT	2018-08-09	PD	2018-11-07	2018-10-16	1	1	dyspnea, weakness	MVAC	2019-01-05	1	1
22071158	1957-04-24	1		2018-07-25	UC	kidney	1	0	1	0	0	1	2	0	48.54	3.7	9.2	315	45.9	46.3	1.47	NA	NA	NA	NA		0	Pembrolizumab	GC	2018-12-05	PR	2019-04-10	2020-02-03	1	1	Neutropenia Pnuemonitis	pembrolizumab	2020-07-30	1	1
22082039	1959-09-06	0		2019-03-13	UC	renal pelvis	1	0	1	0	0	0	1	0	54.66	3.6	9.3	141	62.1	23.3	1.03	38	30	9.8	184		0	Pembrolizumab	G/carbo	2019-07-25	SD	2019-09-11		0	0	Skin rash Diarrhea Fatigue Vomiting Pancytopenia	NA	2022-09-26	0	< 10
22120161	1981-05-08	1		2019-03-27	UC	bladder	0	0	0	0	1	0	0	0	89.81	6.7	9.3	384	66	25.4	0.94	29	10	8.9	507		0	Pembrolizumab	GC	2019-04-18	PD	2019-07-11	2019-06-06	1	1	NA	MVAC	2020-05-19	0	NA
patient 125	1963-08-28	1	57	2018-07-02	UC	bladder	0	0	1	1	1	0	2	0	34.14	5.8	11.8	115	63.8	24.5	1.94	20	16	9.4	174		0	Pembrolizumab	NA	2020-04-16	SD	2020-09-17	2020-09-17	1	1	Sorethroat Acid regurgitation Hypertension Diarrhea	NA	2021-08-24	1	80
22155418	1951-01-10	1		2019-07-16	UC	bladder	0	0	0	0	0	1	1	1	103.26	4.9	10.3	259	67.3	18.8	0.75	18	10	8.8	482		0	Atezolizumab	MVAC	2020-03-31	NA		2020-04-21		1	constipation		2020-04-21	1	NA
22179344	1940-11-18	1		2019-11-29	UC	renal pelvis	1	0	0	0	1	0	0	0	110.61	4.8	7.4	185	75.4	14	0.61	29	20	8.4	166		0	Atezolizumab	GC	2019-12-11	SD	2019-12-11	.	0	0	vomiting Fatigue Anorexia Elevated Amylase	RT	2022-09-06	0	NA
22192167	1976-11-07	0		2020-01-17	UC	bladder	0	0	0	0	1	0	0	0	64	5.6	11.7	241	72.1	23.4	0.95	25	14	8.7	255		0	Atezolizumab	GC	2020-06-23	PR	2020-10-26	2021-02-22	1	1	Neutropenia Pnuemonitis	GC	2022-09-29	0	NA
22245635	1952-01-02	0		2020-07-16	UC	bladder	0	0	0	0	1	0	0	1	23.74	9.2	8.8	259	92.6	6	2.07	23	13	7.8	203		0	Atezolizumab	GC	2020-07-24	NA	2020-11-09	.	0	0	Dizziness	NA	2021-05-10	0	0
2242221	1941-02-01	1		2016-10-06	UC/adenocarcinoma	bladder/prostate	0	1	1	0	1	0	1	0	43.47	8.7	9.5	272	68.8	18.8	1.55	26	16	8.9	203		0	Atezolizumab	Taxotere	2020-03-05	PD	2021-04-29	2020-05-27	1	1	nausea, anorexia	NA	2022-05-12	0	1
patient 126	1960-05-05	0	58	2018-04-04	UC	ureter	1	0	1	0	1	0	1	0	54.85	4.5	7.7	105	79	8.7	1.03	19	5	7.1	565		0	Atezolizumab	NA	2018-10-24	PD	2018-11-14	2018-12-13	1	1	NA	MVAC	2019-02-13	1	NA
2344046	1944-12-07	0		2018-07-25	left UC post NxUx,, PD with duodenal obstruction and carcinomatosis	renal pelvis	1	0	0	0	1	0	0	3	50.13	4.3	9.2	186	76.2	11.3	1.07	35	34	8.5	NA		0	Atezolizumab	RT	2018-08-21	PD	2018-10-08	2018-10-20	1	1	NA	NA	2018-11-28	1	NA
patient 127	1944-08-22	0	77	2018-05-17	UC	bladder	0	0	1	1	1	0	0	1	71.8	8.1	11.1	207	67.8	20.2	0.97	NA	19	NA	NA		0	Atezolizumab	NA	2021-07-15	PD	2021-08-05	2021-08-12	1	1	fatigue,abd pain,vigina bleeding	oral palbocilib	2021-09-24	1	<10
2415875	1948-11-24	0		2019-05-29	UC	ureter	1	0	0	0	1	0	0	1	38.99	4.5	8.2	48	50.8	43	1.34	19	16	8.1	325		0	Pembrolizumab	G/carbo	2019-08-02	PR	2020-07-22	2020-06-24	1	1	Constipation Skin itching Mucositis Skin rash	G+Carbo	2022-09-23	0	3
2434825	1940-08-18	1		2018-01-31	UC	bladder	0	0	0	0	0	0	0	1	74.53	9.8	12.5	256	70	18	0.97	26	39	8.8	244		0	Pembrolizumab	RT	2018-04-25	SD	2018-04-25	2019-08-07	1	1	NA	NA	2020-03-02	0	NA
2449802	1952-06-16	1		2018-03-15	UC	ureter	1	0	0	0	1	1	1	0	71.02	5	12.5	335	73.2	13.2	1.04	20	13	8.8	217		0	Atezolizumab	GC	2020-01-07	PD	2020-03-21	2020-03-30	1	1	NA	NA	2020-06-28	1	IC 5
2466764	1974-06-16	1		2017-03-22	Adenocarcinoma	urachus(bladder)	0	1	0	0	0	0	0	0	60.77	10.1	9.2	560	78.8	9.6	1.28	16	27	9.3	147		0	Pembrolizumab	taxol/cisplatin	2019-01-11	PR		2020-03-25	1	1	Skin rash Fatigue Ileus	NA	2022-02-27	1	1
patient 128	1959-01-10	0	62	2019-04-22	UC	Ureter	1	0	0	0	1	1	1	0	68.7	12.5	10.3	279	82.6	10.4	0.84	26	75	8.7	NA		0	Durvalumab	NA	2020-09-11	PD	2020-11-29	2020-11-26	1	1	fatigue	NA	2021-02-22	1	<10
patient 129	1950-11-03	0	70	2020-06-24	UC	kidney	1	0	1	0	0	0	0	0	17.497	7.3	10.5	393	63.6	19.9	2.69	18	23	8.6	224		0	Nivolumab	NA	2020-10-20	PD	2020-12-31	2020-12-30	1	1	skin itching	taxol	2022-09-12	0	20
patient 130	1974-04-15	1	43	2016-10-13	UC (2016/10/13)	bladder	0	0	0	0	1	0	0	1	47	15.7	8.1	250	73	11	1.48	22	27	8.5	NA		0	Pembrolizumab	NA	2016-11-18	NA	2017-01-03	2017-02-06	1	1	Diarrhea Fatigue	NA	2017-02-13	1	NA
patient 131	1950-07-15	1	70	2019-03-08	undifferentiated carcinoma	right renal pelvis	1	0	0	0	1	0	0	1	62.8	7.8	8.6	76	74	17	1.15	19	17	10.2	NA	S2019=09376	0	Pembrolizumab	NA	2020-02-07	PR	2020-04-30	2020-05-19	0	1	legs edema, exertional dyspnea	NA	2020-08-16	1	25
2638389	1943-06-28	1		2015-12-18	UC	kidney	1	0	1	0	1	0	1	1	83.56	7.8	8.3	466	87	5.7	0.89	14	8	NA	NA		0	Pembrolizumab	GC+docetaxel	2017-06-28	PD	2017-11-06	2017-09-04	1	1	poor intake	NA	2017-11-14	1	NA
2713565	1955-11-28	0		2017-12-12	UC	bladder	0	0	1	0	1	0	1	1	57.14	23.4	9.1	687	89	3.5	0.98	30	25	9.4	246		1	Atezolizumab	G+carbo	2019-07-22	PR	2019-12-17	2020-02-11	1	1	NA	NA	2020-02-20	1	< 10
patient 132	1954-07-20	1	64	2017-06-09	invasive papillary urothelial carcinoma, high grade	left renal pelvis	1	0	1	0	0	0	1	1	60.37	6.8	13.3	158	50	21	1.21	24	33	NA	NA	S2017=22515	0	Pembrolizumab	NA	2018-04-26	PD	2018-05-17	2018-06-12	1	1	fatigue	NA	2018-08-15	1	20
2921815	1941-03-07	1		2018-05-25	UC	Bladder	0	0	0	0	1	0	0	2	109.07	11.5	14.2	330	85.9	9.9	0.7	18	17	9.2	234		0	Atezolizumab	G	2018-12-06	PR	2019-05-02	2019-05-02	0	1	NA	NA	2019-05-02	1	NA
patient 133	1964-04-09	1	53	2015-09-21	urothelial carcinoma	left ureter	1	0	1	0	1	0	1	1	24.7	3.9	8.8	186	64	9	2.75	14	22	9.6	167	S2015=38103	0	Pembrolizumab	NA	2017-01-20	PR	2017-03-06	2017-06-06	1	1	abdominal pain, vomiting, fatigue and weakness		2017-06-06	1	90
3118956	1943-02-27	1		2018-11-27	UC	bladder	0	0	0	0	0	0	0	1	73.5	3.3	13.3	109	54.4	38.8	0.99	35	66	8.8	152		0	Atezolizumab	RT	2018-12-20	CR	2019-02-12	2020-04-09	1	1	NA	cisplatin weeekly	2022-09-28	0	3
patient 134	1947-12-01	1	70	2017-06-14	UC (2017/06/14)	bladder	0	0	0	0	1	0	0	1	30.38	6.2	10.2	139	52.6	22.9	2.16	30	17	9.6	304		0	Pembrolizumab	NA	2017-06-09	CR	2017-11-30	2017-12-18	1	1	Skin itching	RFA	2022-09-22	0	0
3517146	1947-04-05	1		2018-06-01	UC	bladder	0	0	1	0	0	0	1	0	81.9	4.2	12.8	221	69.2	22	0.91	21	14	8.7	197		0	Pembrolizumab	GC	2019-09-12	PR	2020-05-11	2020-05-25	1	1	Constipation Emesis Anemia Insomnia	MVAC	2021-02-01	0	NA
3553742	1935-05-20	0		2020-04-13	UC	renal pelvis	1	0	0	0	1	0	0	3	59.51	10.4	9.1	326	86	7	0.9	22	10	8.7	NA		0	Pembrolizumab	GC	2020-04-29	PD	2020-06-11	2020-06-16	1	1	Anorexia Skin itching Anemia Fatigue Elevated Ca	NA	2020-07-31	0	90
3619520	1956-04-15	1		2013-10-08	UC	Bladder	0	0	0	0	1	0	0	0	44.02	6.9	8	310	77.1	14.7	1.6	27	10	9.2	140		0	Atezolizumab	G	2018-08-16	PD	2018-09-27	2018-10-29	1	1	Fever, dysuria, anorexia	NA	2018-11-05	1	NA
3630886	1945-03-12	0		2018-07-25	UC	bladder	0	0	0	0	0	1	1	0	36.66	7.1	7.5	210	74.3	15.6	1.4	NA	NA	NA	NA		0	Pembrolizumab	G+carbo	2019-11-06	PR	2020-04-01	2020-05-13	1	1	mild dizziness	G+Carbo+ pembro	2022-09-16	0	NA
patient 135	1974-05-13	0	43	2016/12/14(bone)	UC (2017/01/3)	kidney	1	0	1	1	1	1	3	0	179.37	11.3	9	34	69	8	0.39	10	11	8.8	107		0	Pembrolizumab	NA	2017-01-06	PD	2017-04-14	2017-04-07	1	1	Weakness poor appetite	palliative RT	2017-06-13	1	NA
patient 136	1941-12-09	1	76	2016/7/22(CT)	UC (2017/07/25) Melanoma (2016/06/27)	Ureteral	1	0	1	0	0	0	1	NA	56.16	3	10.4	214	40	42	1.25	30	12	8.5	332		0	Atezolizumab	NA	2017-09-28	SD	2018-07-12	2018-07-19	1	1	Diarrhea Anxiety Insomnia	Melanoma meta	2018-08-14	0	NA
patient 137	1942-10-29	1	78	2021-01-05	UC	bladder	0	0	0	1	1	0	1	1	35.53	5.2	9.3	185	64	20	1.85	16	18	9.5	183		0	Nivolumab	NA	2021-02-04	PD	2021-03-18	2021-03-31	1	1	fatigue,skin rash,	NA	2021-04-19	1	0.25
patient 138	1961-07-07	0	59	2020-02-18	UC, high grade	Bladder	0	0	0	0	1	0	0	1	80.38	5.4	10.9	155	72.6	16.7	0.74	39	18	9.9	216		0	Atezolizumab	NA	2020-10-22	PD	2021-09-23	2021-10-14	1	1	abnormal liver function	MVAC	2022-09-08	0	>=10
39021151	1944-06-24	0		2017-02-10	UC	bladder	0	0	1	0	1	1	2	2	49.59	8	9.6	245	61.2	26	1.08	.	13	8.6	.		0	Pembrolizumab	G/carbo	2018-04-02	PD	2018-08-30	2018-05-14	1	1	Dermatitis Hepatitis Malaise Fever	NA	2018-09-30	1	NA
patient 139	1966-01-27	1	55	2020-04-06	UC with sarcomatoid component, high grade	Bladder	0	1	1	1	1	1	3	1	119.045	12.4	9.2	300	85.5	6.7	0.69	35	21	NA	NA		0	Atezolizumab	NA	2020-08-26	PD	2020-10-08	2020-10-24	1	1	vomiting	NA	2020-11-14	1	>50
39147947	1950-03-04	1		2016-12-12	UC	bladder	0	0	0	0	1	0	0	1	10.7	6.1	8	303	70.2	16.8	5.33	28	13	8	280		1.5	Atezolizumab	GC	2018-11-29	PR	2019-01-31	2019-03-26	.	1	Skin itching Anemia Fatigue Dyspnea	NA	2019-03-26	1	10
3932691	1948-03-01	1		2014-07-27	UC	bladder	0	0	0	0	1	0	0	0	15.36	6.9	7.9	335	76.9	11.6	3.89	13	8	NA	NA		1	Atezolizumab	G	2018-11-29	SD	2019-01-10	2019-06-24	1	1	Skin itching pleural effsuion Pyspnea Acute AKD Poor appetite	NA	2019-08-12	0	0
3986041	1946-07-26	1		2016-07-19	UC	ureter	1	0	0	0	1	1	1	2	40.48	7.7	10.3	234	71	16.8	1.68	44	20	9.1	708		2	Pembrolizumab	G+RT	2017-03-30	PD	2017-07-28	2017-05-25	1	1	skin itching, malaise	NA	2017-09-24	1	5
427623	1955-11-04	0		2019-09-05	squamous cell carcinoma, high grade	bladder	0	1	1	0	1	0	1	0	19.51	15.2	6.6	164	94	2.6	2.48	36	35	9.6	213		2	atezolizumab	RT	2020-04-22	NA	2020-05-12	2020-05-31	NA	1	herpes	NA	2020-05-31	1	3
6261810	1955-02-23	1		2015-02-01	UC	bladder	0	0	0	0	1	1	1	1	50.19	8.5	6.1	302	81.8	11.7	1.42	49	22	8.5	462		4	Atezolizumab	Doxorubicin+Vinblastin+Carboplatin	2019-07-18	PD	2019-09-05	2019-09-26	1	1	anemia, fever	NA	2019-12-02	0	NA
6494407	1951-11-22	1		2018-08-23	small cell carcinoma	ureter	1	1	1	0	1	0	1	0	41.4	3.9	14.6	211	67.8	23.5	1.66	19	13	10.1	199		1	Pembrolizumab	cisplatin	2019-09-06	NED	2021-09-07	.	0	0	Neutropenia Skin itching Elevated Cr.	NA	2022-07-05	0	NA
patient 140	1962-12-10	1	57	2019-04-01	UC	ureter	1	0	1	0	1	1	2	1	179.66	10.2	10.1	307	75	9	0.58	33	30	9.3	219		0	Nivolumab	NA	2019-10-17	NA	2019-10-17	2019-10-31	1	1	.	.	2019-10-31	1	< 10
patient 141	1945-11-02	0	73	2017/01/18(CT)	UC (2017/05/19)	ureter and pelvocalyx	1	0	1	0	1	0	1	0	42.8	4.2	10	180	61	31.1	1.23	19	9	9.6	203		0	Atezolizumab	NA	2018-06-13	PD	2018-07-12	2018-08-03	1	1	Epigastric pain General weakness	NA	2018-09-07	1	NA
8798381	1942-04-22	0		2018-01-19	UC	bladder	0	0	0	0	1	0	0	1	65.92	6.7	9	277	68.4	22.3	0.84	39	70	NA	NA		0	Pembrolizumab	GC	2019-04-24	PR	2019-08-23	.	.	0	malaise, neutropenia	NA	2019-12-31	0	8
9611032	1942-05-15	0		2017-04-24	UC	ureter	1	0	1	0	1	0	1	0	28	5.4	8.3	266	73.3	12.9	1.76	NA	14	NA	NA		2	Pembrolizumab	G	2019-05-29	PD	2019-05-29	2019-10-18	1	1	Fever Cold sweating attack	NA	2019-11-29	0	NA
patient 142	1944-01-20	1	75	2015-03-31	infiltrating papillary urothelial carcinoma	bladder	0	0	0	0	1	0	0	3	61.99	8.1	12.6	232	52.1	34	1.15	34	28	8.9	200	S2016=33208	0	Pembrolizumab	NA	2019-06-04	CR	2021-06-01	2022-07-19	0	0	constipation	.	2022-07-19	0	100

## Sheet: legend
Abbreviations
UC	Urothelial carcinoma
PR	Partial response
SD	Stable disease
CR	Complete response
NA	Not available
Coding
origin:0	Lower tract UC
origin:1	Upper tract UC
origin:2	Synchronus upper and lower tract UC
variant:0	Pure urothelial carcinoma
variant:1	Variant histology
lung metastasis:0	no lung metastasis
lung metastasis:1	positive lung metastasis
liver metastasis:0	no liver metastasis
liver metastasis:1	positive liver metastasis
LN metastasis:0	no lymph node metastasis
LN metastasis:1	positive lymph node metastasis
bone metastasis:0	no bone metastasis
bone metastasis:1	positive bone metastasis
IO treatment line:0	Second line and beyond
IO treatment line:1	First line
PD status:0	no progressive disease
PD status::1	confirmed progressive disease
PFS event:0	no PFS event
PFS event::1	confirmed PFS event
expire event:0	not expired
expire event::1	expired
